# Supplementary material for: Lack of Tgfbr1 and Acvr1b synergistically stimulates myofibre hypertrophy and accelerates muscle regeneration
Source: eLife journal article supplement (doi:10.7554/elife.77610), 2022-03-24

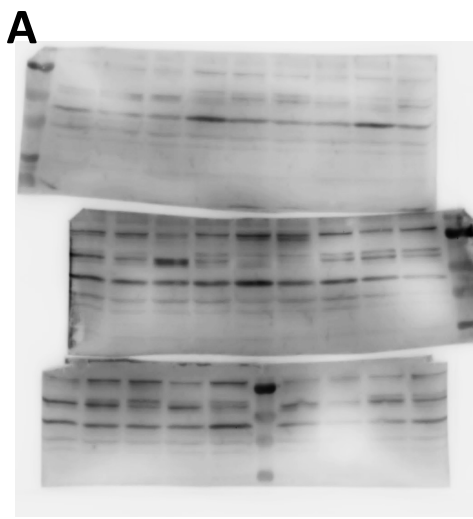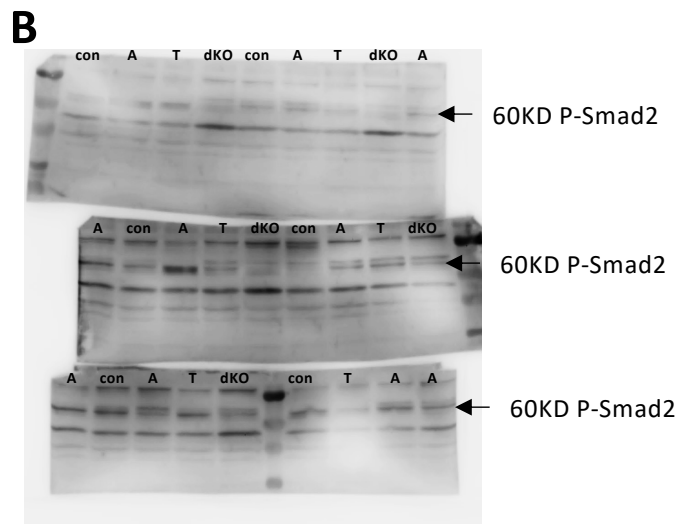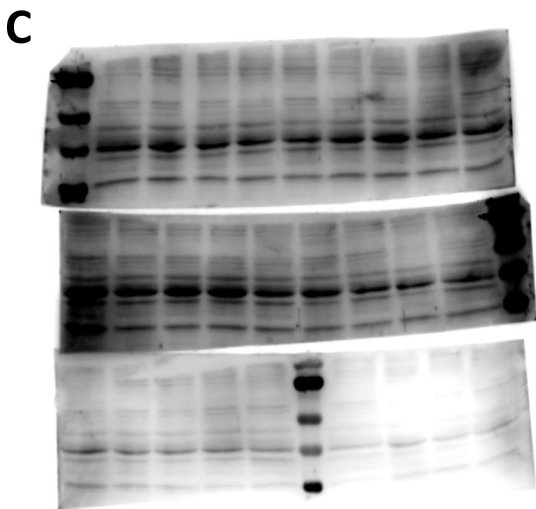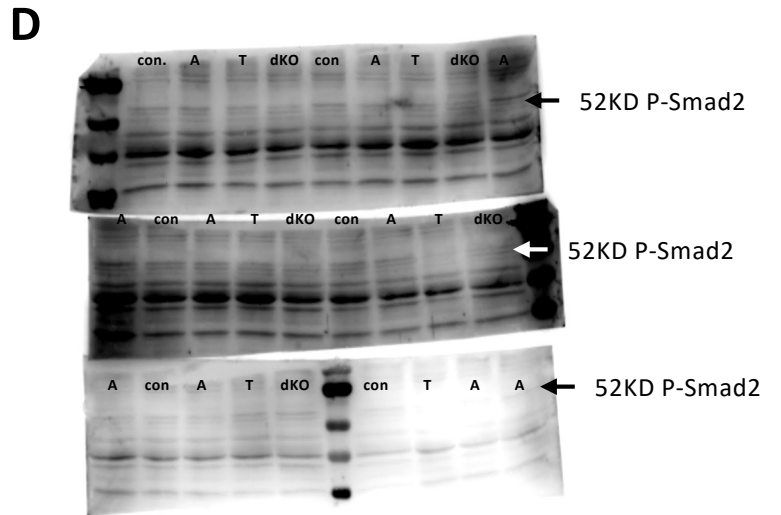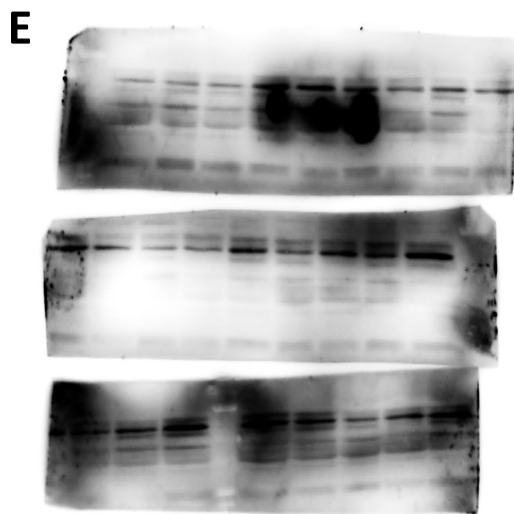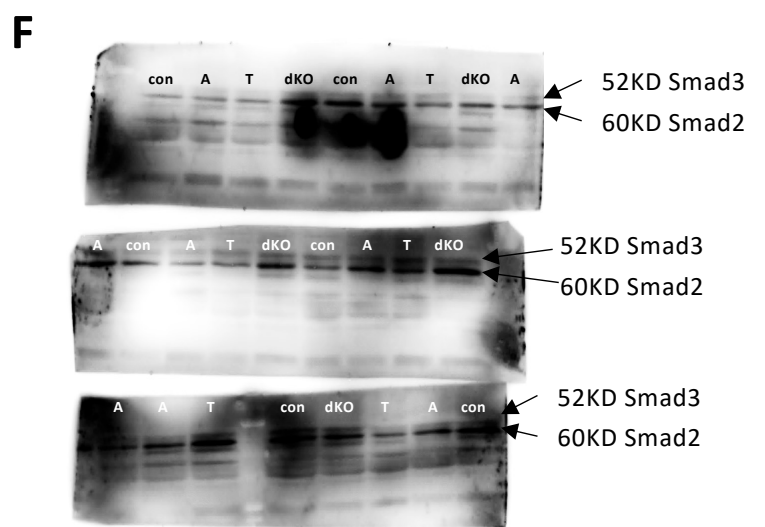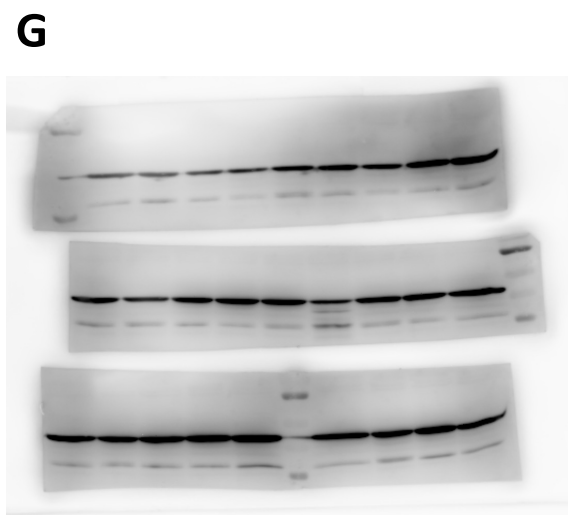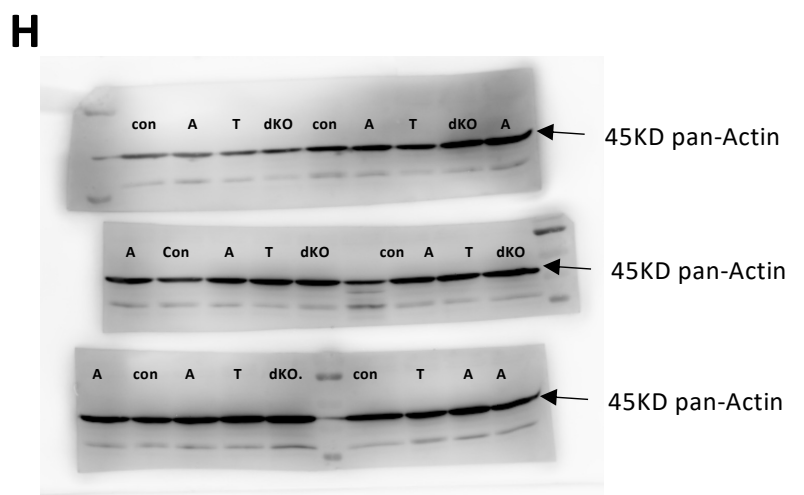

Supplement: fig3-data2 [file elife-77610-fig3-data2-v2.pdf]
