# Supplementary material for: Lack of Tgfbr1 and Acvr1b synergistically stimulates myofibre hypertrophy and accelerates muscle regeneration
Source: eLife. 2022 Mar 24;11:e77610. doi: 10.7554/eLife.77610 (PMC9005187; doi:10.7554/eLife.77610)
Supplement: Figure 1—source data 1. [file elife-77610-fig1-data1.xlsx]

## Sheet: Figure 1C
RAW DATA
ΔΔCT values of 1C
	Acvr1b					Tgfbr1
	Control	Acvr1bfl/fl	Tgfbr1fl/fl	Acvr1bfl/fl:Tgfbr1fl/fl		Control	Acvr1bfl/fl	Tgfbr1fl/fl	Acvr1bfl/fl:Tgfbr1fl/fl
	0.0281158	0.00148691	0.073948	0.00370457		0.0192161	0.022537	0.00441378	0.0127701
	0.0460255	0.00255048	0.0334831	0.00415158		0.02819	0.0223965	0.00461625	0.010492
	0.0471065	0.00160283	0.0638095	0.00128063		0.0184172	0.017509	0.00429412	0.00993824
	0.0829482	0.00119579	0.0560835	0.0186334		0.025375	0.0175437	0.00337058	0.0189429
	0.0893463	0.00188169	0.0586872	0.0128015		0.0195443	0.0182228	0.00421635	0.0196632
	0.101591	0.0031276	0.0621547			0.0225554	0.0275982	0.00262332
	0.0730716	0.00112451				0.0161768	0.019081
		0.00209583					0.0223166
AVE	0.0668865	0.00188321	0.0580277	0.00811433	AVE	0.0213536	0.0209006	0.0039224	0.0143613
SEM	0.0101591	0.00024359	0.0055093	0.00327466	SEM	0.00160071	0.00123224	0.000313027	0.00207567
N	7	8	6	5	N	7	8	6	5
STATISTICS
3 way anova Fig4 D
Tests of Between-Subjects Effects							Tests of Between-Subjects Effects
Dependent Variable: logacvr1b							Dependent Variable: logtgfbr1
Source	Type III Sum of Squares	df	Mean Square	F	Sig.		Source	Type III Sum of Squares	df	Mean Square	F	Sig.
Corrected Model	13,766a	11	1.251	28.941	0		Corrected Model	5,395a	11	0.49	34.346	0
Intercept	40.702	1	40.702	941.294	0		Intercept	0.034	1	0.034	2.361	0.129
Day	0.037	2	0.018	0.423	0.657		Day	2.553	2	1.277	89.409	0
Acvr1b	6.064	1	6.064	140.229	0		Acvr1b	0.888	1	0.888	62.177	0
Tgfbr1	0.745	1	0.745	17.229	0		Tgfbr1	0.086	1	0.086	6.005	0.017
Day * Acvr1b	5.035	2	2.517	58.217	0		Day * Acvr1b	0.036	2	0.018	1.265	0.289
Day * Tgfbr1	0.046	2	0.023	0.535	0.588		Day * Tgfbr1	1.518	2	0.759	53.144	0
Acvr1b*Tgfbr1	0.429	1	0.429	9.923	0.002		Acvr1b*Tgfbr1	0.701	1	0.701	49.071	0
Day * ACvr1b*Tgfbr1	0.182	2	0.091	2.101	0.13		Day * ACvr1b*Tgfbr1	0.106	2	0.053	3.699	0.03
Error	2.94	68	0.043				Error	0.971	68	0.014
Total	60.794	80					Total	6.412	80
Corrected Total	16.706	79					Corrected Total	6.366	79
a. R Squared = ,824 (Adjusted R Squared = ,796)							a. R Squared = ,847 (Adjusted R Squared = ,823)
POST HOC BONFERRONI ANALYSIS Day 0
			Acvr1b	Tgfbr1
Control	Tgfbr1		1	2.45275e-07
Control	Acvr1b		1.98596e-09	1
Control	Acvr1b:Tgfbr1		0.00177928	0.0712635
Acvr1b	Tgfbr1		8.60824e-10	4.77703e-08
Tgfbr1	Acvr1b:Tgfbr1		0.213278	0.0827373
Acvr1b	Acvr1b:Tgfbr1		0.110156	0.0674743
	Spss enty raw data Fig 3		Day: 0=day 0, 2=day 2, 4=day4; Alk4ko: 0=no knockout, 1=knockout; Alk5ko: 0=no knockout, 1=knockout
	Day	Acvr1b KO	Tgfbr1 KO	Tgfbr1	Acvr1b
	0	0	0	0.0192161	0.0281158
	0	0	0	0.02819	0.0460255
	0	0	0	0.0184172	0.0471065
	0	0	0	0.025375	0.0829482
	0	0	0	0.0195443	0.0893463
	0	0	0	0.0225554	0.101591
	0	0	0	0.0161768	0.0730716
	0	0	1	0.00441378	0.073948
	0	0	1	0.00461625	0.0334831
	0	0	1	0.00429412	0.0638094
	0	0	1	0.00337058	0.0560835
	0	0	1	0.00421635	0.0586872
	0	0	1	0.00262332	0.0621547
	0	1	0	0.022537	0.00148691
	0	1	0	0.0223965	0.00255048
	0	1	0	0.017509	0.00160283
	0	1	0	0.0175437	0.00119579
	0	1	0	0.0182228	0.00188169
	0	1	0	0.0275982	0.0031276
	0	1	0	0.019081	0.00112452
	0	1	0	0.0223166	0.00209583
	0	1	1	0.0127701	0.00370457
	0	1	1	0.010492	0.00415158
	0	1	1	0.00993824	0.00128062
	0	1	1	0.0189429	0.0186334
	0	1	1	0.0196632	0.0128015

## Sheet: Figure 1E-H
	DATA SUMMARY and STATISTICS
Figure 1 E		TA mass		EDL mass									TA mass	Two way ANOVA acvr1b*tgfbr1			Pvalue=	0		EDL mass	Two way ANOVA acvr1b*tgfbr1			Pvalue=	0
		MEAN	SEM	MEAN	SEM								Multiple Comparisons: Bonferroni corrections							Multiple Comparisons: Bonferroni corrections
	Control	57.23	1.49	12.7	0.430393								group 1	group 2		Pvalue				group 1	group 2		Pvalue
	Acvr1bfl/fl	60.79	1.49	14.3625	0.517873								Control	Acvr1bfl/fl		0.539172				Control	Acvr1bfl/fl		0.18348
	Tgfbr1fl/fl	64.15	1.35	15.4333	0.50111								Control	Tgfbr1fl/fl		0.0294945				Control	Tgfbr1fl/fl		0.00947241
	Acvr1bfl/fl:Tgfbr1fl/fl	108.38	10.97	23.34	1.47126								Control	Acvr1bfl/fl:Tgfbr1fl/fl		0.000449172				Control	Acvr1bfl/fl:Tgfbr1fl/fl		6.75766e-05
													Acvr1bfl/fl	Tgfbr1fl/fl		0.970804				Acvr1bfl/fl	Tgfbr1fl/fl		1.04212
													Acvr1bfl/fl	Acvr1bfl/fl:Tgfbr1fl/fl		0.000479982				Acvr1bfl/fl	Acvr1bfl/fl:Tgfbr1fl/fl		0.000168133
													Tgfbr1fl/fl	Acvr1bfl/fl:Tgfbr1fl/fl		0.00536323				Tgfbr1fl/fl	Acvr1bfl/fl:Tgfbr1fl/fl		0.00229701
Figure 1 F	CSA per fibre type in TA	Control		Acvr1bfl/fl		Tgfbr1fl/fl		Acvr1bfl/fl:Tgfbr1fl/fl					CSA in IIB myofibre	Two way ANOVA acvr1b*tgfbr1		Pvalue=0.002
		MEAN	SEM	MEAN	SEM	MEAN	SEM	MEAN	SEM				group 1	group 2		Pvalue
	I	908.408	91.8137	802.917	38.2888	953.753	143.551	919.667	224.564				Control	Acvr1bfl/fl		0.633509
	IIA	1103.34	82.6622	1323.84	105.557	1302.32	109.384	1435.99	163.764				Control	Tgfbr1fl/fl		0.581298
	IIX	1785.79	134.803	1691.63	87.5791	2086.17	244.536	2265.94	256.402				Control	Acvr1bfl/fl:Tgfbr1fl/fl		0.00281715
	IIB	2967.7	251.646	3407.15	143.991	3607.21	197.11	6105.87	492.776				Acvr1bfl/fl	Tgfbr1fl/fl		2.40762
	N	5		7		5		5					Acvr1bfl/fl	Acvr1bfl/fl:Tgfbr1fl/fl		0.000247792
													Tgfbr1fl/fl	Acvr1bfl/fl:Tgfbr1fl/fl		0.022163
	CSA per fibre type in EDL	Control		Acvr1bfl/fl:Tgfbr1fl/fl			CSA per fibre type in EDL
		MEAN	SEM	MEAN	SEM		independent t test
	I	321.617	60.0352	401.936	99.4407			Pvalue
	IIA	422.843	19.3577	660.748	51.3432		i	0.490105
	IIX	711.331	54.9386	1073.36	109.283		iix	0.00896765
	IIB	1524.62	123.665	2658.86	193.836		iia	0.00061345
	N	7		5			iib	0.000407928
Figure 1 G	Fibre type distribution in TA	Control		Acvr1bfl/fl		Tgfbr1fl/fl		Acvr1bfl/fl:Tgfbr1fl/fl					Fibre type	Two way ANOVA acvr1b*tgfbr1 Pvalue					LO IIB
	High oxidative area	MEAN	SEM	MEAN	SEM	MEAN	SEM	MEAN	SEM				distribution	HO		LO			Multiple Comparisons: Bonferroni corrections
	I	1.00377	0.50381	1.42334	0.356503	1.44063	0.805343	4.57189	2.69627				I	0.433	square transf	Cannot be calculated			group 1	group 2		Pvalue
	I/IIA	8.2682	3.21008	5.73533	1.42391	3.82655	1.84085	3.57064	1.70718				I/IIA	0.587		Cannot be calculated			Control	Acvr1bfl/fl		1
	IIA	6.0647	3.37595	9.93961	1.85755	7.46238	2.37341	7.4552	0.383093				IIA	0.265	square transf	Cannot be calculated			Control	Tgfbr1fl/fl		1
	IIA/IIX	16.3577	2.80794	22.2586	1.59261	24.4739	5.34015	21.1428	8.53346				IIA/IIX	0.339		0.921	square transf		Control	Acvr1bfl/fl:Tgfbr1fl/fl		0.00980261
	IIX	40.733	7.0223	42.9759	2.08077	46.5648	6.80833	42.0049	5.81654				IIX	0.521		0.163			Acvr1bfl/fl	Tgfbr1fl/fl		0.616444
	IIX/IIB	9.87179	4.30189	2.00733	0.990403	5.85989	3.04765	6.38549	1.90234				IIX/IIB	0.085	square transf	0.905	square transf		Acvr1bfl/fl	Acvr1bfl/fl:Tgfbr1fl/fl		0.090513
	IIB	17.7008	2.55261	15.6599	0.865588	10.3719	3.94747	14.8691	2.62435				IIB	0.195		0.036			Tgfbr1fl/fl	Acvr1bfl/fl:Tgfbr1fl/fl		0.0162906
	N		5		8		5		5
	Fibre type distribution in TA	Control		Acvr1bfl/fl		Tgfbr1fl/fl		Acvr1bfl/fl:Tgfbr1fl/fl
	Low oxidative area	MEAN	SEM	MEAN	SEM	MEAN	SEM	MEAN	SEM
	I	0	0	0	0	0	0	0.25547	0.156589
	I/IIA	0.074349	0.074349	0	0	0	0	0.189463	0.124595
	IIA	0.09009	0.09009	0.710807	0.279737	0.275099	0.19459	1.62901	1.27839
	IIA/IIX	3.55205	1.54444	3.53405	1.62194	2.63594	1.93632	2.50881	1.59771
	IIX	32.6616	3.63634	33.0113	4.60008	29.0682	4.02898	42.3803	4.32753
	IIX/IIB	2.48128	1.24563	5.9296	3.70072	4.6323	2.51371	5.31628	3.0608
	IIB	61.1407	2.25685	56.8142	2.21242	63.3884	3.14011	47.4836	1.79383
	N		5		8		6		5
	Fibre type distribution in EDL	Control		Acvr1bfl/fl:Tgfbr1fl/fl					CSA per fibre type in EDL
		MEAN	SEM	MEAN	SEM				independent t test
	I	1.92857	0.939786	1.44	0.365513					Pvalue
	IIA	13.2857	1.20937	11.2	1.71464				i	0.684483
	IIX	19.2857	3.53698	18.8	2.31084				iix	0.918974
	IIB	62.7143	5.17648	60.2	2.31084				iia	0.32849
	N		7		5				iib	0.706991
Figure 1 H	SDH											SDH	Two way ANOVA acvr1b*tgfbr1			Pvalue=	0.043				Integrated SDH ASSUMPTIONS VIOLATED							Kruskall Wallis			Pvalue	0.018
		N	Mean	Std. Deviation	Std. Error	95% Confidence Interval for Mean		Minimum	Maximum			Multiple Comparisons
						Lower Bound	Upper Bound					Dependent Variable: SDH																control	Acvr1bfl/fl:Tgfbr1fl/fl		Pvalue	0.022
	control	7	3.15e-05	3.9505e-06	1.4932e-06	2.785e-05	3.515e-05	2.67e-05	3.85e-05			Bonferroni
	Acvr1b fl/fl	8	3.4055e-05	5.9932e-06	2.1189e-06	2.904e-05	3.907e-05	2.58e-05	4.31e-05			(I) group		Mean Difference (I-J)	Std. Error	Sig.	95% Confidence Interval
	Tgfbr1 fl/fl	6	2.7992e-05	4.2155e-06	1.721e-06	2.357e-05	3.242e-05	2.36e-05	3.37e-05								Lower Bound	Upper Bound
	Acvr1bfl/fl:Tgfbr1fl/fl	5	2.2378e-05	4.1542e-06	1.8578e-06	1.722e-05	2.754e-05	1.69e-05	2.83e-05			control	Acvr1b fl/fl	-2.555e-06	2.4746e-06	1	-9.728e-06	4.618e-06
	Total	26	2.9722e-05	6.2062e-06	1.2171e-06	2.722e-05	3.223e-05	1.69e-05	4.31e-05				Tgfbr1 fl/fl	3.5083e-06	2.6601e-06	1	-4.202e-06	1.1219e-05
													Acvr1bfl/fl:Tgfbr1fl/fl	.0000091220*	2.7997e-06	0.022	1.007e-06	1.7237e-05
	integrated_SDH											Acvr1b fl/fl	control	2.555e-06	2.4746e-06	1	-4.618e-06	9.728e-06
		N	Mean	Std. Deviation	Std. Error	95% Confidence Interval for Mean		Minimum	Maximum				Tgfbr1 fl/fl	6.0633e-06	2.5822e-06	0.17	-1.421e-06	1.3548e-05
						Lower Bound	Upper Bound						Acvr1bfl/fl:Tgfbr1fl/fl	.0000116770*	2.7258e-06	0.002	3.776e-06	1.9578e-05
	control	7	0.0657332	0.00794955	0.00300465	0.058381	0.0730853	0.0505747	0.0747433			Tgfbr1 fl/fl	control	-3.5083e-06	2.6601e-06	1	-1.1219e-05	4.202e-06
	Acvr1b fl/fl	8	0.0731247	0.0173946	0.00614993	0.0585824	0.087667	0.0513638	0.105106				Acvr1b fl/fl	-6.0633e-06	2.5822e-06	0.17	-1.3548e-05	1.421e-06
	Tgfbr1 fl/fl	6	0.0677817	0.0055736	0.00227541	0.0619326	0.0736309	0.0604069	0.0738848				Acvr1bfl/fl:Tgfbr1fl/fl	5.6137e-06	2.8953e-06	0.393	-2.778e-06	1.4006e-05
	Acvr1bfl/fl:Tgfbr1fl/fl	5	0.102652	0.0209398	0.00936456	0.0766523	0.128653	0.0810293	0.129342			Acvr1bfl/fl:Tgfbr1fl/fl	control	-.0000091220*	2.7997e-06	0.022	-1.7237e-05	-1.007e-06
	Total	26	0.0755801	0.0191445	0.00375455	0.0678474	0.0833127	0.0505747	0.129342				Acvr1b fl/fl	-.0000116770*	2.7258e-06	0.002	-1.9578e-05	-3.776e-06
													Tgfbr1 fl/fl	-5.6137e-06	2.8953e-06	0.393	-1.4006e-05	2.778e-06

## Sheet: Figure 1E G raw data
Figure 1 E								Figure 1 H													Figure 1 F CSA per fibre type in TA						CSA per fibre type in EDL
group	mouseID	TA mass	EDL mass							integrated SDG A660 (um/s)				SDH A660(um^-1 x s^-1)								I	IIX	IIA	IIB			I	IIX	IIA	IIB
Acvr1bfl/fl	143203	64	15.3					control	Acvr1b fl/fl	Tgfbr1 fl/fl	Acvr1b fl/fl:Tgfbr1b fl/fl			control	Acvr1b fl/fl	Tgfbr1 fl/fl	Acvr1b fl/fl:Tgfbr1b fl/fl				Tgfbr1fl/fl	755.435	1551.03	1154.75	3099.6		Control	420.37	519.38	388.29	1556.19
Acvr1bfl/fl	145350	64.4	14.8					0.0747433	0.0852936	0.0625128	0.129342			2.82433e-05	4.31067e-05	2.392e-05	2.08567e-05				Tgfbr1fl/fl	873.126	1851	1218.41	3533.64		Control	135.94	784.16	476.02	1815.55
Acvr1bfl/fl	145353	65.9	14.5					0.0630134	0.0823519	0.0604069	0.0946531			2.66567e-05	3.55667e-05	2.35633e-05	2.22867e-05				Tgfbr1fl/fl	1232.7	1990.08	1208.35	3766.89		Control		786.17	380.88	1726.43
Acvr1bfl/fl	146040	53.6	13.1					0.0706128	0.0732632	0.0688345	0.0810293			3.436e-05	3.03433e-05	2.73867e-05	1.69033e-05				Tgfbr1fl/fl		2034.73	1627.79	4028.69		Control	518.44	825.32	441.32	1649.29
Acvr1bfl/fl	147192	57.4	12.9					0.0667837	0.0613351	0.073669	0.0882174			3.85233e-05	3.30233e-05	2.706e-05	2.351e-05				Tgfbr1fl/fl		3003.99				Control	339.58	895.17	479.71	1673
Acvr1bfl/fl	147196	57.7	13.7					0.0711759	0.0581347	0.0673825	0.12002			3.183e-05	2.91367e-05	3.229e-05	2.83333e-05				Acvr1bfl/fl	610.215	1773.64	1173.53	3728.6		Control	348.96	591.06	346.7	842.66
Acvr1bfl/fl	147200	61.3	13.3					0.0505747	0.0513638	0.0738848				3.05433e-05	2.57667e-05	3.37333e-05					Acvr1bfl/fl	770.368	1450.31	992.99	2850.16		Control	166.41	578.06	446.98	1409.23
Acvr1bfl/fl	153370	62	17.3					0.0632283	0.0681495					3.03867e-05	3.37333e-05						Acvr1bfl/fl	928.477	1695.41	1557.87	3883.99		Acvr1bfl/fl:Tgfbr1fl/fl	395.31	941.58	564.22	2395.47
Tgfbr1fl/fl	145618	67	16.1						0.105106						4.176e-05						Acvr1bfl/fl	882.33	1857.71	1786.34	3301.45		Acvr1bfl/fl:Tgfbr1fl/fl	141.25	1085.19	737.73	2850.24
Tgfbr1fl/fl	145626	62.1	14																		Acvr1bfl/fl	814.731	1558.65	1536.65	3691.4		Acvr1bfl/fl:Tgfbr1fl/fl	277.08	835.62	542.6	2277.56
Tgfbr1fl/fl	145629	67.8	17.4																		Acvr1bfl/fl	795.945	2072.53	1095.52	3354.93		Acvr1bfl/fl:Tgfbr1fl/fl	461.49	1027.65	645.81	2439.82
Tgfbr1fl/fl	145635	59.1	14.8																		Acvr1bfl/fl	763.564	1433.15	1123.98	3039.52		Acvr1bfl/fl:Tgfbr1fl/fl	734.55	1476.77	813.38	3331.23
Tgfbr1fl/fl	146538	65.7	15.7																		Acvr1bfl/fl	857.71	1516.08	907.998	3436.86
Tgfbr1fl/fl	153340	63.2	14.6																		Control	882.885	1855.87	1154.15	3017.58
Control	145425	56.7	12.5																		Control	1004.12	1909.62	1353.62	3898.5
Control	145433	55.9	13.6																		Control	1194.73	2154.13	1077.49	2847.72
Control	146070	55.8	13																		Control	648.761	1347.41	837.478	2457.17
Control	151233	54.2	11.7																		Control	811.537	1661.92	1093.96	2617.55
Control	151239	53.5	11.1																		Acvr1bfl/fl:Tgfbr1fl/fl	1675.38	3102.55	1992.78	7189.72
Control	150492	59.4	12.5																		Acvr1bfl/fl:Tgfbr1fl/fl	857.659	2179.24	1251.21	6977.07
Control	150493	65.1	14.5																		Acvr1bfl/fl:Tgfbr1fl/fl	336.678	1862.95	1127.73	5607.74
Acvr1bfl/fl:Tgfbr1fl/fl	153738	131.1	27.5																		Acvr1bfl/fl:Tgfbr1fl/fl	654.982	1653.83	1185.99	4479.24
Acvr1bfl/fl:Tgfbr1fl/fl	153749	129.2	22.8																		Acvr1bfl/fl:Tgfbr1fl/fl	1073.64	2531.15	1622.24	6275.56
Acvr1bfl/fl:Tgfbr1fl/fl	153750	112.8	25.2
Acvr1bfl/fl:Tgfbr1fl/fl	156501	72.4	18.7
Acvr1bfl/fl:Tgfbr1fl/fl	156489	96.4	22.5
Figure 1 G
FIBRE TYPE DISTRIBUTION in TA																			FIBRE TYPE DISTRIBUTION in EDL
			RAW DATA							PERCENTAGE									PERCENTAGE
	I	IIX	IIA	IIB	I/IIA	IIA/IIX	IIX/IIB	total		I	IIX	IIA	IIB	I/IIA	IIA/IIX	IIX/IIB	total
High oxidative area																				I	IIX	IIA	IIB	total
Control	2	144	0	37	32	36	21	272		0.735294	52.9412	0	13.6029	11.7647	13.2353	7.72059	100		Control	5	7	13	77	100
Control	10	203	2	39	36	52	5	347		2.88184	58.5014	0.576369	11.2392	10.3746	14.9856	1.44092	100		Control	0.3	25	18	44	100
Control	3	68	6	46	48	74	33	278		1.07914	24.4604	2.15827	16.5468	17.2662	26.6187	11.8705	100		Control	0	25	16	55	100
Control	0	88	36	80	0	60	90	354		0	24.8588	10.1695	22.5989	0	16.9492	25.4237	100		Control	1	8	14	57	100
Control	1	133	54	76	6	31	9	310		0.322581	42.9032	17.4194	24.5161	1.93548	10	2.90323	100		Control	1	29	12	53	100
Acvr1bfl/fl	10	107	25	40	31	81	1	295		3.38983	36.2712	8.47458	13.5593	10.5085	27.4576	0.338983	100		Control	6	27	12	75
Acvr1bfl/fl	5	114	16	57	37	78	23	330		1.51515	34.5455	4.84848	17.2727	11.2121	23.6364	6.9697	100		Control	0.2	14	8	78
Acvr1bfl/fl	0	142	18	33	19	43	16	271		0	52.3985	6.64207	12.1771	7.01107	15.8672	5.90406	100		Acvr1bfl/fl:Tgfbr1fl/fl	2	12	7	64	100
Acvr1bfl/fl	6	132	13	48	23	90	0	312		1.92308	42.3077	4.16667	15.3846	7.37179	28.8462	0	100		Acvr1bfl/fl:Tgfbr1fl/fl	1	20	11	65	100
Acvr1bfl/fl	2	150	60	47	3	73	0	335		0.597015	44.7761	17.9104	14.0299	0.895522	21.791	0	100		Acvr1bfl/fl:Tgfbr1fl/fl	0.2	23	14	59	100
Acvr1bfl/fl	4	158	40	72	6	78	2	360		1.11111	43.8889	11.1111	20	1.66667	21.6667	0.555556	100		Acvr1bfl/fl:Tgfbr1fl/fl	2	15	16	52	100
Acvr1bfl/fl	4	147	62	58	6	78	2	357		1.12045	41.1765	17.3669	16.2465	1.68067	21.8487	0.560224	100		Acvr1bfl/fl:Tgfbr1fl/fl	2	24	8	61	100
Acvr1bfl/fl	5	140	26	48	16	49	5	289		1.7301	48.4429	8.99654	16.609	5.53633	16.955	1.7301	100
Tgfbr1fl/fl	10	197	14	30	29	61	19	360		2.77778	54.7222	3.88889	8.33333	8.05556	16.9444	5.27778	100
Tgfbr1fl/fl	6	84	6	0	13	44	0	153		3.92157	54.902	3.92157	0	8.49673	28.7582	0	100
Tgfbr1fl/fl	0	64	31	63	0	99	16	273		0	23.4432	11.3553	23.0769	0	36.2637	5.86081	100
Tgfbr1fl/fl	0	107	9	16	5	90	47	274		0	39.0511	3.28467	5.83942	1.82482	32.8467	17.1533	100
Tgfbr1fl/fl	2	241	59	58	3	30	4	397		0.503778	60.7053	14.8615	14.6096	0.755668	7.55668	1.00756	100
Acvr1bfl/fl:Tgfbr1fl/fl	42	156	20	27	4	30	0	279		15.0538	55.914	7.16846	9.67742	1.43369	10.7527	0	100
Acvr1bfl/fl:Tgfbr1fl/fl	11	84	25	50	17	68	24	279		3.94265	30.1075	8.96057	17.9211	6.09319	24.3728	8.60215	100
Acvr1bfl/fl:Tgfbr1fl/fl	7	140	22	66	4	47	17	303		2.31023	46.2046	7.26073	21.7822	1.32013	15.5116	5.61056	100
Acvr1bfl/fl:Tgfbr1fl/fl	0	64	17	19	0	126	15	241		0	26.556	7.05394	7.88382	0	52.2822	6.22407	100
Acvr1bfl/fl:Tgfbr1fl/fl	5	165	22	55	29	9	37	322		1.5528	51.2422	6.8323	17.0807	9.00621	2.79503	11.4907	100
Low oxidative area
Control	0	73	0	128	0	1	14	216		0	33.7963	0	59.2593	0	0.462963	6.48148	100
Control	0	59	1	146	0	15	1	222		0	26.5766	0.45045	65.7658	0	6.75676	0.45045	100
Control	0	77	0	169	1	20	2	269		0	28.6245	0	62.8253	0.371747	7.43494	0.743494	100
Control	0	45	0	104	0	5	7	161		0	27.9503	0	64.5963	0	3.10559	4.34783	100
Control	0	121	0	139	0	0	1	261		0	46.3602	0	53.2567	0	0	0.383142	100
Acvr1bfl/fl	0	91	3	188	0	46	1	329		0	27.6596	0.911854	57.1429	0	13.9818	0.303951	100
Acvr1bfl/fl	0	13	0	149	0	8	75	245		0	5.30612	0	60.8163	0	3.26531	30.6122	100
Acvr1bfl/fl	0	128	2	170	0	2	3	305		0	41.9672	0.655738	55.7377	0	0.655738	0.983607	100
Acvr1bfl/fl	0	179	1	188	0	10	0	378		0	47.3545	0.26455	49.7354	0	2.6455	0	100
Acvr1bfl/fl	0	92	0	142	0	0	24	258		0	35.6589	0	55.0388	0	0	9.30233	100
Acvr1bfl/fl	0	98	2	171	0	15	0	286		0	34.2657	0.699301	59.7902	0	5.24476	0	100
Acvr1bfl/fl	0	102	6	117	0	6	11	242		0	42.1488	2.47934	48.3471	0	2.47934	4.54545	100
Acvr1bfl/fl	0	88	2	201	0	0	5	296		0	29.7297	0.675676	67.9054	0	0	1.68919	100
Tgfbr1fl/fl	0	89	0	178	0	5	21	293		0	30.3754	0	60.7509	0	1.70648	7.16724	100
Tgfbr1fl/fl	0	54	3	195	0	4	2	258		0	20.9302	1.16279	75.5814	0	1.55039	0.775194	100
Tgfbr1fl/fl	0	31	1	115	0	25	33	205		0	15.122	0.487805	56.0976	0	12.1951	16.0976	100
Tgfbr1fl/fl	0	100	0	167	0	1	7	275		0	36.3636	0	60.7273	0	0.363636	2.54545	100
Tgfbr1fl/fl	0	94	0	223	0	0	2	319		0	29.4671	0	69.906	0	0	0.626959	100
Tgfbr1fl/fl	0	145	0	197	0	0	2	344		0	42.1512	0	57.2674	0	0	0.581395	100
Acvr1bfl/fl:Tgfbr1fl/fl	2	170	0	149	2	0	1	324		0.617284	52.4691	0	45.9877	0.617284	0	0.308642	100
Acvr1bfl/fl:Tgfbr1fl/fl	2	92	20	152	1	26	10	303		0.660066	30.363	6.60066	50.165	0.330033	8.58086	3.30033	100
Acvr1bfl/fl:Tgfbr1fl/fl	0	91	4	112	0	7	45	259		0	35.1351	1.5444	43.2432	0	2.7027	17.3745	100
Acvr1bfl/fl:Tgfbr1fl/fl	0	102	0	127	0	3	6	238		0	42.8571	0	53.3613	0	1.2605	2.52101	100
Acvr1bfl/fl:Tgfbr1fl/fl	0	166	0	149	0	0	10	325		0	51.0769	0	45.8462	0	0	3.07692	100
