# Supplementary material for: Lack of Tgfbr1 and Acvr1b synergistically stimulates myofibre hypertrophy and accelerates muscle regeneration
Source: eLife. 2022 Mar 24;11:e77610. doi: 10.7554/eLife.77610 (PMC9005187; doi:10.7554/eLife.77610)
Supplement: Figure 2—source data 1. [file elife-77610-fig2-data1.xlsx]

## Sheet: Figure 2 A
Regenerating areas percentage D0 in TA						TA
	Control	Acvr1bfl/fl	Tgfbr1fl/fl	Acvr1bfl/fl:Tgfbr1fl/fl		Independent-Samples Kruskal-Wallis Test Summary
	0.11	0.03	0.04	0.21		Total N	23
	0.12	0	0.07	2.59		Test Statistic	12,722a
	0.04	0.09	0.03	2.9		Degree Of Freedom	3
	0.0286333	0.1	0	2.17		Asymptotic Sig.(2-sided test)	0.005
	0.0486536	0.13	0	6.87		a The test statistic is adjusted for ties.
	0	0.77
		0.05
AVE	0.0578811	0.167143	0.028	2.948
SEM	0.0193095	0.101857	0.0131909	1.08661
N	6	7	5	5
Regenerating areas percentage at day 0 in EDL						EDL						Independent-Samples Kruskal-Wallis Test Summary
	Control	Acvr1bfl/fl:Tgfbr1fl/fl
	0	4.42857				Tests of Normality
	0.0630842	0					group	Shapiro-Wilk
	0.0365335	1.99014						Statistic	df	Sig.
	0	0.383777				regeneration_region_edl	control	0.684	7	0.002
	0.0855427	0.897905					doubleKO	0.876	5	0.291
	0.352897					* This is a lower bound of the true significance.
	0					a Lilliefors Significance Correction
AVE	0.0896762	1.54008
SEM	0.0477618	0.795839
N	7	5

## Sheet: Figure 2 B
RAW DATA						STATISTICS
	SC per myofibre					Kruskall Wallis analysis of SC per myofibre
	Control	Acvr1bfl/fl	Tgfbr1fl/fl	Acvr1bfl/fl:Tgfbr1fl/fl		Test Statisticsa,b
	0.007937	0.008811	0.008032	0.017094			sc_fibre		Control	ctrl
	0.008547	0.015686	0.003953	0.015152		Chi-Square	11.2589		Acvr1bfl/fl	HA
	0.004762	0.012821	0.010989	0.030303		df	3		Tgfbr1fl/fl	HT
	0.004444	0.011321	0.021834	0.038462		Asymp. Sig.	0.0104052		Acvr1bfl/fl:Tgfbr1fl/fl	double
	0.008969	0.007843	0.020833	0.043478		a. Kruskal Wallis Test
	0.008264	0.009174				b. Grouping Variable: group
		0.0181
AVE	0.00715383	0.0119651	0.0131282	0.0288978
SEM	0.000819464	0.00144222	0.00353473	0.00563164
N	6	7	5	5

## Sheet: Figure 2 C
macrophage number in TA
	Control		Acvr1bfl/fl		Tgfbr1fl/fl		Acvr1bfl/fl:Tgfbr1fl/fl
	sample ID	result	sample ID	result	sample ID	result	sample ID	result
	150492	0.710737	145350	3.55368	145618	5.68589	153738	12.7933
	145433	1.42147	146040	0.710737	145626	11.3718	156501	18.4792
	145425	4.97516	147196	3.55368	153340	4.97516	153750	38.3798
	146070	0.710737	145353	2.84295	146538	0.710737	156489	25.5865
	150493	0.710737	153370	0.710737	145635	0	153749	23.4543
			143203	2.52573	145629	4.26442
			147192	0
			147200	0
	mean	1.70577		1.73772		4.50133		23.7386
	sem	0.828854		0.544345		1.66851		4.27389
	Tests of Normality
	group		Shapiro-Wilk
			Statistic	df	Sig.
	f480	Control	0.657577	5	0.00326548
		Acvr1bfl/fl (ha)	0.84764	8	0.0901584
		Tgfbr1fl/fl (ht)	0.921138	6	0.513596
		Acvr1bfl/fl:Tgfbr1fl/fl (hat)	0.959386	5	0.803701
	*. This is a lower bound of the true significance.
	a. Lilliefors Significance Correction

## Sheet: Figure 2 raw data
	group	mouseID	regeneration area in TA on day 0	regeneration area in EDL on day 0	pax 7 perc in TA
	Acvr1bfl/fl	143203	0.0338815		0.008811
	Acvr1bfl/fl	145350	0		0.015686
	Acvr1bfl/fl	145353	0.0897665		0.012821
	Acvr1bfl/fl	146040	0.102628		0.011321
	Acvr1bfl/fl	147192	0.129784		0.007843
	Acvr1bfl/fl	147196			0.009174
	Acvr1bfl/fl	147200	0.766367		0.0181
	Acvr1bfl/fl	153370	0.0547506
	Tgfbr1fl/fl	145618	0.0370826		0.008032
	Tgfbr1fl/fl	145626	0.0693926		0.003953
	Tgfbr1fl/fl	145629	0.0278172		0.010989
	Tgfbr1fl/fl	145635	0		0.021834
	Tgfbr1fl/fl	146538	0		0.020833
	Tgfbr1fl/fl	153340
	Control	145425	0.10817	0	0.007937
	Control	145433	0.117819	0.0630842	0.008547
	Control	146070	0.044182	0.0365335	0.004762
	Control	151233	0.0286333	0	0.004444
	Control	151239		0.0855427	0.008969
	Control	150492	0.0486536	0.352897	0.008264
	Control	150493	0	0
	Acvr1bfl/fl:Tgfbr1fl/fl	153738	0.21168	4.42857	0.017094
	Acvr1bfl/fl:Tgfbr1fl/fl	153749	2.58646	0	0.015152
	Acvr1bfl/fl:Tgfbr1fl/fl	153750	2.89711	1.99014	0.030303
	Acvr1bfl/fl:Tgfbr1fl/fl	156501	2.16992	0.383777	0.038462
	Acvr1bfl/fl:Tgfbr1fl/fl	156489	6.87319	0.897905	0.043478
