# Supplementary material for: Lack of Tgfbr1 and Acvr1b synergistically stimulates myofibre hypertrophy and accelerates muscle regeneration
Source: eLife. 2022 Mar 24;11:e77610. doi: 10.7554/eLife.77610 (PMC9005187; doi:10.7554/eLife.77610)
Supplement: Figure 3—source data 1. [file elife-77610-fig3-data1.xlsx]

## Sheet: Figure 3 A
		# nuclei/IIB myofibre			95% Confidence Interval for Mean		Minimum	Maximum	# nuclei/IIB myofibre								Myonuclear domain			95% Confidence Interval for Mean		Minimum	Maximum	Myonuclear domain
		MEAN	SEM	N	Lower Bound	Upper Bound			Independent samples T-test				0.371				MEAN	SEM	N	Lower Bound	Upper Bound			Independent samples T-test				0.045
	Control	1.216	0.179321	5	0.718125	1.71387	0.83	1.73	equal variances not assumed Pvalue				ns			Control	2664.84	449.801	5	1415.99	3913.69	1677.91	3937.87	equal variances assumed Pvalue
	Acvr1bfl/fl:Tgfbr1fl/fl	1.412	0.0956765	5	1.14636	1.67764	1.07	1.64								Acvr1bfl/fl:Tgfbr1fl/fl	4479.37	619.059	5	2760.59	6198.16	2731.25	6520.63
	group	mouseID	nuclei/fibre	CSA/nucleus			length of nuclei in TA			Tests of Normality
	Acvr1bfl/fl	143203					Control	9.92937		group		Shapiro-Wilk
	Acvr1bfl/fl	145350					Control	11.9364				Statistic	df	Sig.
	Acvr1bfl/fl	145353					Control			nuclei_length	control	0.96725	6	0.873475
	Acvr1bfl/fl	146040					Control	7.39247			doubleKO	0.92054	7	0.473597
	Acvr1bfl/fl	147192					Control	9.81657
	Acvr1bfl/fl	147196					Control	8.41207
	Acvr1bfl/fl	147200					Control	8.93997
	Acvr1bfl/fl	153370					average	9.38333		Independent Samples Test
	Tgfbr1fl/fl	145618					sem	0.630035				Levene's Test for Equality of Variances		t-test for Equality of Means
	Tgfbr1fl/fl	145626					Acvr1bfl/fl:Tgfbr1fl/fl	9.41043				F	Sig.	t	df	Sig. (2-tailed)	Mean Difference	Std. Error Difference	95% Confidence Interval of the Difference
	Tgfbr1fl/fl	145629					Acvr1bfl/fl:Tgfbr1fl/fl	8.50077											Lower	Upper
	Tgfbr1fl/fl	145635					Acvr1bfl/fl:Tgfbr1fl/fl	9.60663		nuclei_length	Equal variances assumed	2.90806	0.11618	0.579423	11	0.573979	0.369048	0.636923	-1.03281	1.7709
	Tgfbr1fl/fl	146538					Acvr1bfl/fl:Tgfbr1fl/fl	9.22277
	Tgfbr1fl/fl	153340					Acvr1bfl/fl:Tgfbr1fl/fl	8.4945
	Control	145425	1.73	3017.58			Acvr1bfl/fl:Tgfbr1fl/fl	9.79437
	Control	145433	0.99	3898.5			Acvr1bfl/fl:Tgfbr1fl/fl	8.07404
	Control	146070	0.83	2847.72			average	9.01429
	Control	151233	0.97	2457.17			sem	0.244393
	Control	151239
	Control	150492
	Control	150493	1.56	2617.55
	Acvr1bfl/fl:Tgfbr1fl/fl	153738	1.52	7189.72
	Acvr1bfl/fl:Tgfbr1fl/fl	153749	1.07	6977.07
	Acvr1bfl/fl:Tgfbr1fl/fl	153750	1.45	5607.74
	Acvr1bfl/fl:Tgfbr1fl/fl	156501	1.64	4479.24
	Acvr1bfl/fl:Tgfbr1fl/fl	156489	1.38	6275.56

## Sheet: Figure 3 B
TA
	westernblot in TA
			psmad3	normalized p smad3	psmad2	normalized p smad2	psmad3/smad2/3	normalized psmad3/smad2/3	psmad2/smad2/3	normalized psmad2/smad2/3	lg10(normalized psmad3/smad2/3)	lg10(normalized psmad2/smad2/3)
		sample ID
	control	has-145425	0.0854615	0.469216	0.237492	2.65338	0.686058	1.82772	1.90651	4.09565	0.26	0.61			Tests of Normality
	control	has-151239	0.247723	1.36009	0.115178	1.28683	0.544677	1.45107	0.253245	0.544032	0.16	-0.26			group		Kolmogorov-Smirnova			Shapiro-Wilk
	control	has-146070	0.215185	1.18144	0.0426594	0.476613	0.269701	0.71851	0.053467	0.11486	-0.14	-0.94					Statistic	df	Sig.	Statistic	df	Sig.
	control	has-150493	0.122712	0.673734	0.0478905	0.535058	0.0739255	0.196945	0.0288508	0.0619786	-0.71	-1.21			lg10(normalized psmad3/smad2/3)	control	0.258253	5	.200*	0.904175	5	0.433392
	control	has-150492	0.261938	1.43814	0.0486871	0.543957										ha	0.191669	8	.200*	0.917746	8	0.411843
	control	has-145433	0.159802	0.877372	0.0451255	0.504166	0.302448	0.80575	0.0854066	0.183474	-0.09	-0.74				ht	0.194679	6	.200*	0.933284	6	0.605689
		average		0.999833		1		1.0002		1	-0.103765	-0.5073				hat	0.325021	5	0.0909165	0.866924	5	0.25419
		sem		0.15891		0.353953		0.287262		0.778579	0.168524	0.319586			lg10(normalized psmad2/smad2/3)	control	0.226349	5	.200*	0.922207	5	0.544275
	Acvr1bfl/fl	ha-143203	0.17184	0.943465	0.225058	2.51446	1.13904	3.03451	1.49179	3.20474	0.48	0.51				ha	0.217096	8	.200*	0.875628	8	0.170964
	Acvr1bfl/fl	ha-145350	0.185081	1.01616	0.120477	1.34603	1.3941	3.71401	0.907479	1.94949	0.57	0.29				ht	0.164727	6	.200*	0.958149	6	0.80537
	Acvr1bfl/fl	ha-146040	0.225647	1.23889	0.0554344	0.619342	0.430085	1.14579	0.105659	0.226981	0.06	-0.64				hat	0.325693	5	0.0892737	0.788097	5	0.0645834
	Acvr1bfl/fl	ha-145353	0.678521	3.72533	0.0214816	0.240003	1.21162	3.22788	0.0383593	0.0824052	0.51	-1.09
	Acvr1bfl/fl	ha-153370	0.327526	1.79824	0.0296695	0.331483	0.276737	0.737254	0.0250687	0.0538538	-0.13	-1.27			Levene's Test of Equality of Error Variancesa							Levene's Test of Equality of Error Variancesa
	Acvr1bfl/fl	ha-147200	0.232747	1.27787	0.0411033	0.459227	0.141779	0.377713	0.0250382	0.0537883	-0.42	-1.27			Dependent Variable: lg10(normalized psmad3/smad2/3)	lgpsmad3_raito						Dependent Variable: lg10(normalized psmad2/smad2/3)	lgpsmad2_ratio
	Acvr1bfl/fl	ha-147192	0.214548	1.17795	0.0290678	0.324761	0.741947	1.97662	0.100522	0.215946	0.3	-0.67			F	df1	df2	Sig.				F	df1	df2	Sig.
	Acvr1bfl/fl	ha-147196	0.235866	1.29499	0.013667	0.152695	0.245699	0.654567	0.0142368	0.0305842	-0.18	-1.51			1.05912	3	20	0.388523				0.200079	3	20	0.895091
		average		1.559		0.748375		1.85875		0.72725	0.147166	-0.70549
		sem		0.322357		0.284775		0.465263		0.421545	0.131198	0.263399
	Tgfbr1fl/fl	ht-145618	0.401706	2.20552	0.164264	1.83524	1.61211	4.29482	0.659219	1.41616	0.63	0.15			Tests of Between-Subjects Effects							Tests of Between-Subjects Effects
	Tgfbr1fl/fl	ht-145626	0.191548	1.05167	0.270507	3.02224	0.325217	0.866409	0.459275	0.986637	-0.06	-0.01			Dependent Variable: lg10(normalized psmad3/smad2/3)	lgpsmad3_raito						Dependent Variable: lg10(normalized psmad2/smad2/3)	lgpsmad2_ratio
	Tgfbr1fl/fl	ht-145629	0.277252	1.52222	0.0141725	0.158343	0.309627	0.824877	0.0158275	0.0340014	-0.08	-1.47			Source	Type III Sum of Squares	df	Mean Square	F	Sig.		Source	Type III Sum of Squares	df	Mean Square	F	Sig.
	Tgfbr1fl/fl	ht-153340	0.473207	2.59808	0.00322163	0.0359938	0.423913	1.12934	0.00288604	0.00619992	0.05	-2.22			Corrected Model	.968a	3	0.322702	2.92118	0.0591195		Corrected Model	1.290a	3	0.429981	0.734306	0.543751
	Tgfbr1fl/fl	ht-145638	0.222228	1.22012	0.0384635	0.429734	0.614399	1.63682	0.106341	0.228446	0.21	-0.64			Intercept	0.101112	1	0.101112	0.915293	0.350136		Intercept	15.4871	1	15.4871	26.4483	4.95426e-05
	Tgfbr1fl/fl	ht-145635	0.0778609	0.427486	0.0180831	0.202034	0.187141	0.498561	0.0434632	0.0933697	-0.3	-1.03			alk4	0.0622599	1	0.0622599	0.563591	0.461559		alk4	0.389104	1	0.389104	0.664498	0.424578
		average		1.50417		0.947167		1.54183		0.460667	0.0752964	-0.869762			alk5	0.178381	1	0.178381	1.61475	0.218408		alk5	1.03801	1	1.03801	1.77267	0.198029
		sem		0.323257		0.495612		0.572058		0.242746	0.131307	0.367577			alk4 * alk5	0.727544	1	0.727544	6.5859	0.0184191		alk4 * alk5	0.0216598	1	0.0216598	0.0369898	0.849425
	Acvr1bfl/fl:Tgfbr1fl/fl	hat-153738	0.171982	0.944248	0.0897127	1.00232	0.243953	0.649914	0.127255	0.273376	-0.19	-0.56			Error	2.2094	20	0.11047				Error	11.7112	20	0.585561
	Acvr1bfl/fl:Tgfbr1fl/fl	hat-153749	0.0775473	0.425764	0.0360376	0.40263	0.160021	0.426313	0.0743647	0.159754	-0.37	-0.8			Total	3.20454	24					Total	28.6033	24
	Acvr1bfl/fl:Tgfbr1fl/fl	hat-153750	0.116835	0.641468	0.0101511	0.113413	0.0722504	0.192482	0.0062774	0.0134854	-0.72	-1.89			Corrected Total	3.17751	23					Corrected Total	13.0012	23
	Acvr1bfl/fl:Tgfbr1fl/fl	hat-156501	0.420323	2.30773	0.0144625	0.161583	0.165094	0.439826	0.00568056	0.0122033	-0.36	-1.92
	Acvr1bfl/fl:Tgfbr1fl/fl	hat-156489	0.127843	0.701907	0.0502102	0.560974	0.19479	0.518939	0.0765034	0.164348	-0.28	-0.79
		average		1.0042		0.4482		0.4454		0.1244	-0.383151	-1.19035			bonferroni comparison (adjust p value=0.00833)
		sem		0.336235		0.160582		0.0747981		0.0499806	0.0895062	0.2941			group 1	group 2	p value
															Control	Acvr1bfl/fl	0.259354
															Control	Tgfbr1fl/fl	0.415738
															Control	Acvr1bfl/fl:Tgfbr1fl/fl	0.181737
															Acvr1bfl/fl	Tgfbr1fl/fl	0.703005
															Acvr1bfl/fl	Acvr1bfl/fl:Tgfbr1fl/fl	0.0137171
															Tgfbr1fl/fl	Acvr1bfl/fl:Tgfbr1fl/fl	0.0216006
EDL
	westernblot in EDL
	group	normalized psmad2/smad23	normalized psmad3/smad23	normalized psmad2	normalized psmad3	normalized smad2/3	lg10(psmad3/smad23)
	control	0.969369	1.52932	0.621088	1.06682	0.62405	0.18
	control	0.753435	1.69802	0.72514	1.7793	0.937413	0.23
	control	1.23247	0.718192	0.904659	0.573957	0.714932	-0.14						Tests of Normality
	control	1.24166	1.25333	0.675963	0.742877	0.530244	0.1						group		Kolmogorov-Smirnova			Shapiro-Wilk
	control	0.71947	0.402575	0.920267	0.560631	1.24582	-0.4								Statistic	df	Sig.	Statistic	df	Sig.
	control	1.03994	1.03817	1.53468	1.66804	1.43736	0.02						normalized psmad2/smad23	control	0.169243	7	.200*	0.902522	7	0.34653
	control	1.04366	0.360383	1.6182	0.608369	1.51018	-0.44							ha	0.260335	8	0.117874	0.830632	8	0.0602728
	average	1	1	1	1	1	-0.0642857							ht	0.167695	6	.200*	0.923604	6	0.531686
	sem	0.0781286	0.199911	0.154891	0.198333	0.151122	0.10235							hat	0.183887	5	.200*	0.982174	5	0.945908
	Acvr1bfl/fl	0.395095	0.464007	0.415436	0.531198	1.02414	-0.33
	Acvr1bfl/fl	1.2104	0.884993	0.881037	0.701352	0.70896	-0.05
	Acvr1bfl/fl	1.1969	0.821083	0.656415	0.490272	0.534165	-0.09						Levene's Test of Equality of Error Variancesa
	Acvr1bfl/fl	2.17581	1.09394	1.28189	0.701702	0.573834	0.04						Dependent Variable: normalized psmad2/smad23	psmad2_smad23
	Acvr1bfl/fl	2.87018	3.80607	2.67554	3.86287	0.907944	0.58						F	df1	df2	Sig.
	Acvr1bfl/fl	0.449931	0.518415	0.934226	1.17196	2.02237	-0.29						5.51871	3	22	0.00557126
	Acvr1bfl/fl	0.474605	1.0625	0.735539	1.7928	1.50948	0.03
	Acvr1bfl/fl	0.34286	0.725598	0.794906	1.83157	2.25816	-0.14
	average	1.13947	1.17208	1.04687	1.38547	1.19238	-0.03125
	sem	0.332304	0.384746	0.248552	0.40122	0.234676	0.0994886
	Tgfbr1fl/fl	0.891272	0.973121	0.959453	1.14054	1.0485	-0.01
	Tgfbr1fl/fl	0.333906	0.417829	0.324464	0.442048	0.946449	-0.38
	Tgfbr1fl/fl	0.855321	1.57424	0.611222	1.22482	0.696025	0.2
	Tgfbr1fl/fl	0.703337	0.638505	0.681473	0.673564	0.943714	-0.19
	Tgfbr1fl/fl	0.525249	0.643606	0.899146	1.19954	1.66732	-0.19
	Tgfbr1fl/fl	0.230234	0.222417	0.301732	0.317358	1.27646	-0.65
	average	0.589886	0.744954	0.629582	0.832977	1.09641	-0.203333
	sem	0.111537	0.195059	0.113298	0.165992	0.137449	0.11988
	Acvr1bfl/fl:Tgfbr1fl/fl	0.964375	1.09339	0.664131	0.81981	0.670753	0.04
	Acvr1bfl/fl:Tgfbr1fl/fl	0.761233	0.76065	0.48672	0.529512	0.622754	-0.12
	Acvr1bfl/fl:Tgfbr1fl/fl	0.729695	1.06926	0.720372	1.14928	0.961547	0.03
	Acvr1bfl/fl:Tgfbr1fl/fl	0.409483	0.72482	0.73157	1.40987	1.74011	-0.14
	Acvr1bfl/fl:Tgfbr1fl/fl	0.560738	0.682757	0.88446	1.1725	1.53629	-0.17						Tests of Normality
	average	0.685105	0.866176	0.697451	1.0162	1.10629	-0.072						group		Kolmogorov-Smirnova			Shapiro-Wilk
	sem	0.0941303	0.0887778	0.0641013	0.153713	0.227054	0.0444297								Statistic	df	Sig.	Statistic	df	Sig.
													lg10(psmad3/smad23)	control	0.18896	7	.200*	0.898429	7	0.321572
														ha	0.276201	8	0.0729651	0.851326	8	0.098259
														ht	0.181126	6	.200*	0.981855	6	0.960398
														hat	0.286946	5	.200*	0.820236	5	0.117258
													Levene's Test of Equality of Error Variancesa
													Dependent Variable: lg10(psmad3/smad23)	lgpsmad3_smad23
													F	df1	df2	Sig.
													0.875645	3	22	0.468751
													Tests of Between-Subjects Effects
													Dependent Variable:	lgpsmad3_smad23
													Source	Type III Sum of Squares	df	Mean Square	F	Sig.
													Corrected Model	.114a	3	0.0378732	0.56979	0.640786
													Intercept	0.219147	1	0.219147	3.297	0.0830618
													alk4	0.0442541	1	0.0442541	0.665788	0.423271
													alk5	0.0514149	1	0.0514149	0.77352	0.388636
													alk4 * alk5	0.016007	1	0.016007	0.240821	0.628473
													Error	1.46231	22	0.0664687
													Total	1.77827	26
													Corrected Total	1.57593	25
													EDL: control vs Acvr1bfl/fl:Tgfbr1fl/fl
															Levene's Test for Equality of Variances		t-test for Equality of Means
															F	Sig.	t	df	Sig. (2-tailed)	Mean Difference	Std. Error Difference	95% Confidence Interval of the Difference
																						Lower	Upper
													psmad2_smad23	Equal variances assumed	9.49249e-05	0.992418	2.5827	10	0.0272895	0.314895	0.121925	0.0432301	0.586561
														Equal variances not assumed			2.57415	8.66733	0.0308752	0.314895	0.12233	0.0365385	0.593252
													psmad3_smad23	Equal variances assumed	5.40776	0.0423768	0.533367	10	0.60543	0.133824	0.250904	-0.425225	0.692873
														Equal variances not assumed			0.611804	8.12587	0.557393	0.133824	0.218737	-0.369227	0.636875

## Sheet: Figure 3 C
qPCR in TA
	RAW DATA
	ΔΔCT values of 1C
		TGF-beta					MSTN					Igf1ea					Mgf					Fgf-2
		Control	Acvr1bfl/fl	Tgfbr1fl/fl	Acvr1bfl/fl:Tgfbr1fl/fl		Control	Acvr1bfl/fl	Tgfbr1fl/fl	Acvr1bfl/fl:Tgfbr1fl/fl		Control	Acvr1bfl/fl	Tgfbr1fl/fl	Acvr1bfl/fl:Tgfbr1fl/fl		Control	Acvr1bfl/fl	Tgfbr1fl/fl	Acvr1bfl/fl:Tgfbr1fl/fl		Control	Acvr1bfl/fl	Tgfbr1fl/fl	Acvr1bfl/fl:Tgfbr1fl/fl
		0.025837	0.0206376	0.0240415	0.0687675		0.0534746	0.0672608	0.0703231	0.0735781		0.0525631	0.117774	0.173376	0.103255		0.00293136	0.00507519	0.0056024	0.00257748		0.00371824	0.0055265	0.00378464	0.00320776
		0.027087	0.024735	0.0245122	0.0790968		0.0665687	0.0657062	0.0719054	0.090556		0.110849	0.104296	0.122105	0.109964		0.00461499	0.00468404	0.00409624	0.00278303		0.00630375	0.00355764	0.0025874	0.00413804
		0.020472	0.0230952	0.02218	0.0665544		0.0587124	0.0561144	0.0642417	0.0808304		0.0885285	0.0846436	0.0803816	0.121717		0.00382555	0.0041077	0.00408324	0.00276969		0.00363895	0.00367881	0.0042925	0.00357171
		0.0238306	0.0217907	0.0166958	0.0503981		0.0825368	0.0602572	0.0858898	0.131879		0.0528031	0.0749564	0.0960257	0.0981901		0.00205133	0.00267293	0.00338797	0.00232827		0.00348646	0.00518361	0.00409132	0.00242462
		0.027791	0.0218918	0.02347	0.0514401		0.0786734	0.0753395	0.0889649	0.143816		0.0861957	0.112242	0.14856	0.126025		0.00288447	0.00491949	0.00655848	0.00324518		0.00367266	0.0037233	0.00438627	0.00490259
		0.0365564	0.0224109	0.0243011			0.08009	0.0699973	0.0768423			0.114888	0.134743	0.118996			0.00503241	0.00628487	0.00571354			0.00514593	0.00452413	0.0030085
		0.0352485	0.027939				0.075931	0.0664518				0.155851	0.0822375				0.00770308	0.00318329				0.00406613	0.00424077
			0.0232358					0.0795005					0.160204					0.00798025					0.00388011
	AVE	0.0281175	0.023217	0.0225334	0.0632514	AVE	0.0708553	0.0675785	0.0763612	0.104132	AVE	0.0945256	0.108887	0.123241	0.11183	AVE	0.00414903	0.00486347	0.00490698	0.00274073	AVE	0.0042903	0.00428936	0.00369177	0.00364894
	SEM	0.00221071	0.000798542	0.00121648	0.00546411	SEM	0.00429987	0.00266633	0.00388618	0.0141518	SEM	0.0138434	0.0102317	0.0138462	0.00530253	SEM	0.000710727	0.000597727	0.000500161	0.000150644	SEM	0.000396877	0.000259937	0.000299887	0.000418952
	N	7	8	6	5	N	7	8	6	5	N	7	8	6	5	N	7	8	6	5	N	7	8	6	5
		Hgf					Il-6					Vegf					Murf1					Atrogin-1
		Control	Acvr1bfl/fl	Tgfbr1fl/fl	Acvr1bfl/fl:Tgfbr1fl/fl		Control	Acvr1bfl/fl	Tgfbr1fl/fl	Acvr1bfl/fl:Tgfbr1fl/fl		Control	Acvr1bfl/fl	Tgfbr1fl/fl	Acvr1bfl/fl:Tgfbr1fl/fl		Control	Acvr1bfl/fl	Tgfbr1fl/fl	Acvr1bfl/fl:Tgfbr1fl/fl		Control	Acvr1bfl/fl	Tgfbr1fl/fl	Acvr1bfl/fl:Tgfbr1fl/fl
		0.00084686	0.00088804	0.00083081	0.0051586		0.000113936	7.63176e-05	0.000130443	0.00011838		0.164915	0.211545	0.139624	0.090451		1.64277	0.469554	0.529634	0.393555		1.55328	0.642513	0.890459	0.434709
		0.00049055	0.00057233	0.00126923	0.00301106		8.24882e-05	0.000187905	0.000107344	9.52648e-05		0.148643	0.158957	0.146126	0.08355		0.619524	0.786424	0.518277	0.270778		0.826654	0.544135	0.598581	0.539887
		0.00071262	0.00063632	0.0006515	0.00260149		5.9804e-05	0.000140601	0.000152524	7.63625e-05		0.167277	0.149165	0.137197	0.103587		0.500333	0.58838	0.549077	0.393083		0.6723	0.435635	0.503418	0.477609
		0.00049983	0.00043489	0.00064348	0.00230524		6.55358e-05	6.91317e-05	8.9883e-05	8.29264e-05		0.208526	0.14042	0.128159	0.077207		0.61742	0.506539	0.414595	0.276737		0.759562	0.620186	0.353024	0.55583
		0.00065677	0.00056045	0.00044567	0.00216454		6.66599e-05	6.56392e-05	6.29908e-05	0.000104087		0.157903	0.134177	0.152219	0.091615		0.471827	0.378651	0.320546	0.336827		0.503463	0.340805	0.282395	0.595865
		0.00068238	0.00069836	0.00064401			6.08512e-05	0.000161659	9.10683e-05			0.238531	0.234526	0.125792			0.564727	0.542621	0.517473			0.557531	0.580537	0.371217
		0.00052116	0.00110409				5.32827e-05	7.42366e-05				0.252835	0.18128				0.413359	0.536946				0.300221	0.852923
			0.00073805					7.42414e-05					0.204864					0.493941					0.355365
	AVE	0.000630024	0.000704066	0.00074745	0.00304819	AVE	7.1794e-05	0.000106216	0.000105709	9.54041e-05	AVE	0.191233	0.176867	0.138186	0.089282	AVE	0.689995	0.537882	0.474934	0.334196	AVE	0.739002	0.546512	0.499849	0.52078
	SEM	5.01311e-05	7.44118e-05	0.000115613	0.000547155	SEM	7.81027e-06	1.73669e-05	1.3033e-05	7.48859e-06	SEM	0.0158282	0.0130722	0.00415197	0.00441647	SEM	0.161378	0.0416797	0.0363565	0.0267596	SEM	0.150913	0.059887	0.0908711	0.0287257
	N	7	8	6	5	N	7	8	6	5	N	7	8	6	5	N	7	8	6	5	N	7	8	6	5
	STATISTICS
		POST HOC analysis for ANOVA (ANOVA results presented at figure 3 and 4)
		Post HOC Bonferroni Pvalues				Hgf	Mgf	Igf1ea	Vegf	TGF-beta	Atrogin-1
		Day0	Control	Tgfbr1		1	1	0.91088	0.0359453	0.635814	1
			Control	Acvr1b		1	1	1	1	0.419708	1
			Control	Acvr1b:Tgfbr1		1.18646e-05	0.769128	1	0.00016767	0.000376555	1
			Acvr1b	Tgfbr1		1	1	1	0.130749	1	1
			Tgfbr1	Acvr1b:Tgfbr1		0.000209924	0.00370346	1	0.000996589	5.55925e-06	1
			Acvr1b	Acvr1b:Tgfbr1		2.88829e-05	0.0490641	1	0.000186021	5.17081e-07	1
		Kruskall Wallis
		Il-6									Pairwise Comparisons of Mstn day 0									Pairwise Comparisons of Murf1 day 0
		1	The distribution of il60 is the same across categories of GROUP.	Independent-Samples Kruskal-Wallis Test	0.256	Retain the null hypothesis.					Sample 1-Sample 2	Test Statistic	Std. Error	Std. Test Statistic	Sig.	Adj. Sig.a				Sample 1-Sample 2	Test Statistic	Std. Error	Std. Test Statistic	Sig.	Adj. Sig.a
		Fgf-2									Acvr1fl/fl*Control	-3.25	3.958	-0.821	0.412	1				Tgfbr1fl/fl*Acvr1bfl/fl:Tgfbr1fl/fl	9.333	4.631	2.016	0.044	0.263
		Hypothesis Test Summary									Tgfbr1fl/fl*Acvrbflfl	6.083	4.131	1.473	0.141	0.845				Acvr1bfl/fl*Acvr1bfl/fl:Tgfbr1fl/fl	11.625	4.36	2.667	0.008	0.046
		3	The distribution of fgf20 is the same across categories of GROUP.	Independent-Samples Kruskal-Wallis Test	0.539	Retain the null hypothesis.					Acvr1bfl/fl:Acvr1bfl/fl:tgfbr1fl/fl	-12.85	4.36	-2.947	0.003	0.019				Control*Acvr1bfl/fl:Tgfbr1fl/fl	-14	4.478	-3.127	0.002	0.011
		Mstn									Tgfbr1fl/fl*Control	2.833	4.255	0.666	0.506	1				Acvr1bfl/fl*Tgfbr1fl/fl	-2.292	4.13	-0.555	0.579	1
		Hypothesis Test Summary									Control*Avcr1bfl/fl:Tgfbr1fl/fl	9.6	4.479	2.144	0.032	0.192				Tgfbr1fl/fl*Control	-4.667	4.255	-1.097	0.273	1
			Null Hypothesis	Test	Sig.	Decision					Tgfbr1fl/fl*Acvrbflfl:Tgfbr1fl/fl	-6.767	4.631	-1.461	0.144	0.864				Acvr1bfl/fl*Control	-2.375	3.958	-0.6	0.548	1
		1	The distribution of mstn0 is the same across categories of GROUP.	Independent-Samples Kruskal-Wallis Test	0.027	Reject the null hypothesis.					Each row tests the null hypothesis that the Sample 1 and Sample 2 distributions are the same.									Each row tests the null hypothesis that the Sample 1 and Sample 2 distributions are the same.
		Murf1									Asymptotic significances (2-sided tests) are displayed. The significance level is ,05.									Asymptotic significances (2-sided tests) are displayed. The significance level is ,05.
		Hypothesis Test Summary									a. Significance values have been adjusted by the Bonferroni correction for multiple tests.									a. Significance values have been adjusted by the Bonferroni correction for multiple tests.
		5	The distribution of murf10 is the same across categories of GROUP.	Independent-Samples Kruskal-Wallis Test	0.013	Reject the null hypothesis.

## Sheet: Figure 3 D
westernblot in TA
	RAW DATA													Relative intensity
		pAKt	actin	tAkt	actin	pAKT/actin	AKT/actin	pAKT/AKT				norm pAKT			pAKT	AKT	pAKT/AKT
	Control	469870	3630648	1063355	1117113	0.129418	0.951878	0.13596	0.0690704	0.617445	0.117888	1.87371	1.54164	1.1533	1	1	1	Mean	Control
	Control	303042	3125062	768991	726113	0.0969715	1.05905	0.0915645				1.40395	1.71522	0.776705	0.490613	0.499025	0.319189	SD
	Acvr1bfl/fl:Tgfbr1fl/fl	351456	1917234	2352033	560113	0.183314	4.19921	0.0436544	0.158753	1.61152	0.147457	2.65402	6.80095	0.370303	0.185434	0.188614	0.120642	SEM
	Control	145435	2257991	970598	1233770	0.064409	0.786693	0.0818732				0.932513	1.27411	0.694497
	Acvr1bfl/fl:Tgfbr1fl/fl	462284	2785113	1857134	1852548	0.165984	1.00248	0.165574				2.40311	1.62359	1.4045	2.29843	2.60999	1.25081	Mean	Acvr1bfl/fl:Tgfbr1fl/fl
	Control	138263	2981991	785648	2636740	0.046366	0.297962	0.155611				0.671286	0.482573	1.31998	0.656936	2.38114	0.76188	SD
	Acvr1bfl/fl:Tgfbr1fl/fl	400284	1904577	2603054	2157205	0.21017	1.20668	0.174172				3.04283	1.95431	1.47743	0.293791	1.06488	0.340723	SEM
	Control	126849	3166941	1216426	2764426	0.0400541	0.440028	0.0910262				0.579903	0.712661	0.772139
	Acvr1bfl/fl:Tgfbr1fl/fl	208213	2313577	2607326	2323891	0.0899961	1.12197	0.0802129				1.30296	1.81711	0.680414
	Control	104435	2895527	1354255	3488205	0.0360677	0.388238	0.0929009				0.522188	0.628783	0.788041
	Acvr1bfl/fl:Tgfbr1fl/fl	469698	3254941	2094912	3972983	0.144303	0.527289	0.27367				2.08922	0.853987	2.32143
	Control	209092	2978234	1388255	3485790	0.0702067	0.398261	0.176283				1.01645	0.645015	1.49534
		pp70	actin	pp70/actin	p70	actin	p70/actin	pp70/p70	ave pp70	ave p70	ave pp70/p70	norm pp70	norm p70	pp70/p70	norm pp70	norm p70	pp70/p70
	Control	107263	7079024	0.0151522	2298368	3237690	0.709879	0.0213448	0.0202275	0.911077	0.0224285	0.749089	0.779164	0.951684	1	1	1	Mean	Control
	Acvr1bfl/fl:Tgfbr1fl/fl	248163	8656974	0.0286663	1730740	2770276	0.624754	0.0458841				1.41719	0.685731	2.0458	0.307362	0.206069	0.290874	SD
	Control	125749	7037489	0.0178684	1729083	2295962	0.753097	0.0237266				0.883372	0.826601	1.05788	0.116172	0.0778869	0.10994	SEM
	Acvr1bfl/fl:Tgfbr1fl/fl	279527	5358933	0.0521609	1518841	1651719	0.919552	0.0567243				2.57871	1.0093	2.52912
	Control	169163	6078832	0.0278282	1657205	1717891	0.964674	0.0288473				1.37576	1.05883	1.28619	1.90444	1.29286	1.63502	Mean	Acvr1bfl/fl:Tgfbr1fl/fl
	Acvr1bfl/fl:Tgfbr1fl/fl	271820	7867267	0.0345508	2101154	1815790	1.15716	0.0298583				1.7081	1.2701	1.33127	0.482615	0.604488	0.636842	SD
	Control	92092	8039510	0.0114549	1223134	1514426	0.807655	0.0141829				0.566304	0.886484	0.632364	0.215832	0.270335	0.284805	SEM
	Acvr1bfl/fl:Tgfbr1fl/fl	255749	7941681	0.0322034	1911326	1742134	1.09712	0.0293527				1.59206	1.2042	1.30873
	Control	114092	6257196	0.0182337	1238305	1140770	1.0855	0.0167975				0.901431	1.19145	0.748939
	Acvr1bfl/fl:Tgfbr1fl/fl	201577	4476589	0.0450292	1816255	868648	2.0909	0.0215358				2.22613	2.29497	0.960199
	Control	129263	5422589	0.0238379	1534548	1256355	1.22143	0.0195164				1.17849	1.34064	0.870162
	Control	161263	5925004	0.0272174	1599134	1914426	0.835307	0.0325837				1.34556	0.916835	1.45278
	STATISTICS		Squared transformation was performed for pp70/p70 for equal variances
		Group Statistics
			group	N	Mean	Std. Deviation	Std. Error Mean			Independent Samples Test
		pakt	Control	7	1	0.49061	0.18543					Levene's Test for Equality of Variances		t-test for Equality of Means
			Acvr1bfl/fl:Tgfbr1fl/fl	5	2.2984	0.65694	0.29379					F	Sig.	t	df	Sig. (2-tailed)	Mean Difference	Std. Error Difference	95% Confidence Interval of the Difference
		pakt_akt	Control	7	1	0.31919	0.12064												Lower	Upper
			Acvr1bfl/fl:Tgfbr1fl/fl	5	1.2508	0.76188	0.34072			pakt	Equal variances assumed	0.348	0.568	-3.938	10	0.003	-1.29843	0.3297	-2.03304	-0.56381
		pp70	Control	7	1.0014	0.30851	0.11661				Equal variances not assumed			-3.737	7.074	0.007	-1.29843	0.34742	-2.11821	-0.47864
			Acvr1bfl/fl:Tgfbr1fl/fl	5	1.906	0.48315	0.21607			pakt_akt	Equal variances assumed	3.772	0.081	-0.791	10	0.447	-0.25081	0.31712	-0.9574	0.45577
		sqrtppp	Control	7	0.9967	0.14524	0.0549				Equal variances not assumed			-0.694	5.013	0.519	-0.25081	0.36145	-1.17921	0.67758
			Acvr1bfl/fl:Tgfbr1fl/fl	5	1.2654	0.24688	0.11041			pp70	Equal variances assumed	2.404	0.152	-3.982	10	0.003	-0.90457	0.22714	-1.41067	-0.39847
											Equal variances not assumed			-3.684	6.312	0.009	-0.90457	0.24553	-1.49822	-0.31092
										sqrtppp	Equal variances assumed	2.989	0.115	-2.385	10	0.038	-0.26873	0.11269	-0.51982	-0.01765
		Independent Samples Effect Sizes									Equal variances not assumed			-2.179	5.979	0.072	-0.26873	0.1233	-0.57071	0.03324
				Standardizera	Point Estimate	95% Confidence Interval
						Lower	Upper
		pakt	Cohen's d	0.56307	-2.306	-3.794	-0.754
			Hedges' correction	0.61021	-2.128	-3.501	-0.696
			Glass's delta	0.65694	-1.976	-3.681	-0.186
		pakt_akt	Cohen's d	0.54158	-0.463	-1.617	0.713
			Hedges' correction	0.58693	-0.427	-1.492	0.658
			Glass's delta	0.76188	-0.329	-1.479	0.858
		pp70	Cohen's d	0.38792	-2.332	-3.827	-0.772
			Hedges' correction	0.4204	-2.152	-3.531	-0.713
			Glass's delta	0.48315	-1.872	-3.524	-0.132
		sqrtppp	Cohen's d	0.19245	-1.396	-2.666	-0.073
			Hedges' correction	0.20856	-1.288	-2.46	-0.067
			Glass's delta	0.24688	-1.088	-2.403	0.315
		a The denominator used in estimating the effect sizes.
		Cohen's d uses the pooled standard deviation.
		Hedges' correction uses the pooled standard deviation, plus a correction factor.
		Glass's delta uses the sample standard deviation of the control group.
