# Supplementary material for: Lack of Tgfbr1 and Acvr1b synergistically stimulates myofibre hypertrophy and accelerates muscle regeneration
Source: eLife. 2022 Mar 24;11:e77610. doi: 10.7554/eLife.77610 (PMC9005187; doi:10.7554/eLife.77610)
Supplement: Figure 4—source data 1. [file elife-77610-fig4-data1.xlsx]

## Sheet: Figure 3C
Injury size
	Control		Acvr1bfl/fl		Tgfbr1fl/fl		Acvr1bfl/fl:Tgfbr1fl/fl
	Mean	SEM	Mean	SEM	Mean	SEM	Mean	SEM
	28.3	3.4	26.5	3.1	21.1	2.4	28.14	4.04704
	N	10	N	16	N	12	N	11
		ANOVA
		sqin
			Sum of Squares	df	Mean Square	F	Sig.
		Between Groups	3.657	3	1.219	1.009	0.398
		Within Groups	54.363	45	1.208
		Total	58.02	48
RAW DATA
	day 4	Control	Acvr1bfl/fl	Tgfbr1fl/fl	Acvr1bfl/fl:Tgfbr1fl/fl
		21.2963	27.9455	17.9432	14.9234
		26.4916	14.6148	17.1934	7.52661
		23.3699	53.8239	11.9781	19.2031
		17.0417	42.5292	13.9914	18.524
		22.5902	26.6238	12.6638	24.8397
			37.1502	24.2359	41.9117
			43.3559
			21.3909
	day 2	54.1386	23.2727	34.7616	47.4617
		30.9642	24.4278	24.4401	35.2076
		31.5667	14.096	14.6583	46.6281
		34.6925	20.5324	22.8274	32.139
		20.3612	30.4044	38.2563	21.2061
			16.231	19.7921
			9.09597
			17.9016

## Sheet: Figure 3D
DATA SUMMARY					Control		Acvr1bfl/fl		Tgfbr1fl/fl		Acvr1bfl/fl:Tgfbr1fl/fl
N					Mean	SEM	Mean	SEM	Mean	SEM	Mean	SEM			Post HOC Bonferroni Pvalues				Tgfbr1	Acvr1b	Tgfbeta1	Cd68	Cd163	Il-1beta
Control	Day 0	7		Tgfbr1											Day0	Control	Tgfbr1		2.45275e-07	1	0.635814	1	1	1
	Day 2	7		Day 0	1	0.07	1	0.06	0.2	0.01	0.7	0.1				Control	Acvr1b		1	1.98596e-09	0.419708	1	1	1
	Day 4	8		Day 2	1.2	0.08	1.4	0.07	1.1	0.11	2.2	0.35				Control	Acvr1b:Tgfbr1		0.0712635	0.00177928	0.000376555	0.00420329	0.347792	0.190641
Acvr1bfl/fl	Day 0	8		Day 4	1.2	0.1	1.3	0.16	1.2	0.14	2.8	0.51				Acvr1b	Tgfbr1		4.77703e-08	8.60824e-10	1	1	1	1
	Day 2	8		Acvr1b												Tgfbr1	Acvr1b:Tgfbr1		0.0827373	0.213278	5.55925e-06	0.0103598	0.0174619	0.00077892
	Day 4	8		Day 0	1	0.15	0.028	0.0036	0.9	0.08	0.1	0.05				Acvr1b	Acvr1b:Tgfbr1		0.0674743	0.110156	5.17081e-07	6.05119e-05	0.0026516	0.00539053
Tgfbr1fl/fl	Day 0	6		Day 2	0.2	0.02	0.1	0.02	0.3	0.04	0.3	0.08
	Day 2	6		Day 4	0.3	0.06	0.1	0.01	0.2	0.03	0.2	0.03			Day2	Control	Tgfbr1		1	1	0.635089	0.454004	1	1
	Day 4	6		Tgf-beta1												Control	Acvr1b		0.447081	1	1	1	1	1
Acvr1bfl/fl:Tgfbr1fl/fl	Day 0	5		Day 0	1	0.08	0.8	0.03	0.8	0.04	2.2	0.19				Control	Acvr1b:Tgfbr1		0.0106468	1	1	1	1	1
	Day 2	5		Day 2	7.9	0.8	7.5	0.41	6	0.84	8.1	1.16				Acvr1b	Tgfbr1		0.230093	0.0296619	0.552356	1	0.233717	1
	Day 4	6		Day 4	4.2	0.23	4.5	0.33	4.4	0.42	6.5	0.51				Tgfbr1	Acvr1b:Tgfbr1		0.0177728	1	1	1	1	1
				Mstn												Acvr1b	Acvr1b:Tgfbr1		0.0324937	0.515592	1	1	0.187342	1
				Day 0	1	0.06	1	0.04	1.1	0.05	1.5	0.2
				Day 2	0.1	0.03	0.2	0.04	0.3	0.08	0.7	0.25			Day4	Control	Tgfbr1		1	1	1	0.549684	1	1
				Day 4	0.2	0.02	0.2	0.01	0.2	0.02	0.3	0.06				Control	Acvr1b		1	0.000874878	1	1	1	1
				Cd68												Control	Acvr1b:Tgfbr1		0.0042471	1	0.00152732	0.0458923	0.0603384	0.400742
				Day 0	1	0.25	0.9	0.16	1.4	0.43	4	0.38				Acvr1b	Tgfbr1		1	0.000413555	1	1	0.54414	0.176523
				Day 2	90.7	5.49	81.5	5.42	72.9	8.04	80.8	15.7				Tgfbr1	Acvr1b:Tgfbr1		0.0103235	1	0.0399075	0.32082	0.139463	0.469184
				Day 4	17.5	1.98	20.6	2.79	23	2.23	33.9	6.82				Acvr1b	Acvr1b:Tgfbr1		0.0221424	0.0233232	0.0189677	0.249333	0.0210122	1
				Cd163
				Day 0	1	0.17	0.9	0.06	0.8	0.1	1.5	0.07
				Day 2	1.3	0.17	1.1	0.11	1.7	0.28	1.6	0.18
				Day 4	0.7	0.1	0.6	0.11	0.8	0.07	1.2	0.11
				il-1beta
				Day 0	1	0.32	0.6	0.13	0.6	0.12	2.1	0.25
				Day 2	11.8	2.53	9.8	1.54	7.3	1.38	10.7	3.41
				Day 4	2.6	0.57	3.2	0.43	2	0.24	4	0.58
				Il-6
				Day 0	1	0.11	1.5	0.24	1.5	0.18	1.3	0.1
				Day 2	12.5	2	11.3	1.23	8.1	0.95	10.4	2.7
				Day 4	2.4	0.18	2.3	0.2	2.3	0.29	2.9	0.43
	Three WAY ANOVA
	Tests of Between-Subjects Effects							Tests of Between-Subjects Effects							Tests of Between-Subjects Effects							Tests of Between-Subjects Effects							Tests of Between-Subjects Effects							Tests of Between-Subjects Effects
	Dependent Variable: logtgfbr1							Dependent Variable: logacvr1b							Dependent Variable: logtgfbeta							Dependent Variable: logcd68							Dependent Variable: logcd163							Dependent Variable: logil1b
	Source	Type III Sum of Squares	df	Mean Square	F	Sig.		Source	Type III Sum of Squares	df	Mean Square	F	Sig.		Source	Type III Sum of Squares	df	Mean Square	F	Sig.		Source	Type III Sum of Squares	df	Mean Square	F	Sig.		Source	Type III Sum of Squares	df	Mean Square	F	Sig.		Source	Type III Sum of Squares	df	Mean Square	F	Sig.
	Corrected Model	5,395a	11	0.49	34.346	0		Corrected Model	13,766a	11	1.251	28.941	0		Corrected Model	11,045a	11	1.004	109.566	0		Corrected Model	47,789a	11	4.344	134.243	0		Corrected Model	1,567a	11	0.142	6.448	0		Corrected Model	15,843a	11	1.44	21.025	0
	Intercept	0.034	1	0.034	2.361	0.129		Intercept	40.702	1	40.702	941.294	0		Intercept	21.211	1	21.211	2314.63	0		Intercept	96.413	1	96.413	2979.14	0		Intercept	0	1	0	0.017	0.897		Intercept	13.124	1	13.124	191.58	0
	Day	2.553	2	1.277	89.409	0		Day	0.037	2	0.018	0.423	0.657		Day	9.275	2	4.637	506.055	0		Day	42.122	2	21.061	650.784	0		Day	0.702	2	0.351	15.886	0		Day	12.633	2	6.317	92.208	0
	Acvr1b	0.888	1	0.888	62.177	0		Acvr1b	6.064	1	6.064	140.229	0		Acvr1b	0.256	1	0.256	27.907	0		Acvr1b	0.275	1	0.275	8.491	0.005		Alk4ko	0.038	1	0.038	1.724	0.194		Alk4ko	0.469	1	0.469	6.848	0.011
	Tgfbr1	0.086	1	0.086	6.005	0.017		Tgfbr1	0.745	1	0.745	17.229	0		Tgfbr1	0.09	1	0.09	9.841	0.003		Tgfbr1	0.553	1	0.553	17.099	0		Alk5ko	0.407	1	0.407	18.424	0		Alk5ko	0.037	1	0.037	0.541	0.465
	Day * Acvr1b	0.036	2	0.018	1.265	0.289		Day * Acvr1b	5.035	2	2.517	58.217	0		Day * Acvr1b	0.048	2	0.024	2.608	0.081		Day * Acvr1b	0.255	2	0.127	3.936	0.024		Day * Alk4ko	0.088	2	0.044	2.002	0.143		Day * Alk4ko	0.146	2	0.073	1.063	0.351
	Day * Tgfbr1	1.518	2	0.759	53.144	0		Day * Tgfbr1	0.046	2	0.023	0.535	0.588		Day * Tgfbr1	0.169	2	0.085	9.227	0		Day * Tgfbr1	0.732	2	0.366	11.307	0		Day * Alk5ko	0.052	2	0.026	1.177	0.315		Day * Alk5ko	0.448	2	0.224	3.267	0.044
	Acvr1b*Tgfbr1	0.701	1	0.701	49.071	0		Acvr1b*Tgfbr1	0.429	1	0.429	9.923	0.002		Acvr1b*Tgfbr1	0.348	1	0.348	38.007	0		Acvr1b*Tgfbr1	0.275	1	0.275	8.511	0.005		Alk4ko * Alk5ko	0.227	1	0.227	10.267	0.002		Alk4ko * Alk5ko	0.521	1	0.521	7.604	0.007
	Day * ACvr1b*Tgfbr1	0.106	2	0.053	3.699	0.03		Day * ACvr1b*Tgfbr1	0.182	2	0.091	2.101	0.13		Day * ACvr1b*Tgfbr1	0.142	2	0.071	7.768	0.001		Day * ACvr1b*Tgfbr1	0.261	2	0.131	4.039	0.022		Day * Alk4ko * Alk5ko	0.063	2	0.032	1.435	0.245		Day * Alk4ko * Alk5ko	0.344	2	0.172	2.508	0.089
	Error	0.971	68	0.014				Error	2.94	68	0.043				Error	0.623	68	0.009				Error	2.201	68	0.032				Error	1.48	67	0.022				Error	4.658	68	0.069
	Total	6.412	80					Total	60.794	80					Total	33.052	80					Total	147.261	80					Total	3.068	79					Total	33.476	80
	Corrected Total	6.366	79					Corrected Total	16.706	79					Corrected Total	11.668	79					Corrected Total	49.99	79					Corrected Total	3.047	78					Corrected Total	20.502	79
	a. R Squared = ,847 (Adjusted R Squared = ,823)							a. R Squared = ,824 (Adjusted R Squared = ,796)							a. R Squared = ,947 (Adjusted R Squared = ,938)							a. R Squared = ,956 (Adjusted R Squared = ,949)							a. R Squared = ,514 (Adjusted R Squared = ,435)							a. R Squared = ,773 (Adjusted R Squared = ,736)
	Kruskall Wallis
	Il-6
	1	The distribution of il60 is the same across categories of GROUP.	Independent-Samples Kruskal-Wallis Test	0.256	Retain the null hypothesis.
	2	The distribution of il62 is the same across categories of GROUP.	Independent-Samples Kruskal-Wallis Test	0.276	Retain the null hypothesis.
	2	The distribution of il64 is the same across categories of group.	Independent-Samples Kruskal-Wallis Test	0.665	Retain the null hypothesis.
	Mstn
	Hypothesis Test Summary
		Null Hypothesis	Test	Sig.	Decision
	1	The distribution of mstn0 is the same across categories of GROUP.	Independent-Samples Kruskal-Wallis Test	0.027	Reject the null hypothesis.
	2	The distribution of mstn2 is the same across categories of GROUP.	Independent-Samples Kruskal-Wallis Test	0.094	Retain the null hypothesis.
	1	The distribution of mstn4 is the same across categories of group.	Independent-Samples Kruskal-Wallis Test	0.135	Retain the null hypothesis.
	Asymptotic significances are displayed. The significance level is ,050.
	Pairwise Comparisons of Mstn day 0
	Sample 1-Sample 2	Test Statistic	Std. Error	Std. Test Statistic	Sig.	Adj. Sig.a
	Acvr1fl/fl*Control	-3.25	3.958	-0.821	0.412	1
	Tgfbr1fl/fl*Acvrbflfl	6.083	4.131	1.473	0.141	0.845
	Acvr1bfl/fl:Acvr1bfl/fl:tgfbr1fl/fl	-12.85	4.36	-2.947	0.003	0.019
	Tgfbr1fl/fl*Control	2.833	4.255	0.666	0.506	1
	Control*Avcr1bfl/fl:Tgfbr1fl/fl	9.6	4.479	2.144	0.032	0.192
	Tgfbr1fl/fl*Acvrbflfl:Tgfbr1fl/fl	-6.767	4.631	-1.461	0.144	0.864
	Each row tests the null hypothesis that the Sample 1 and Sample 2 distributions are the same.
	Asymptotic significances (2-sided tests) are displayed. The significance level is ,05.
	a. Significance values have been adjusted by the Bonferroni correction for multiple tests.
	SPSS entry raw data		Day: 0=day 0, 2=day 2, 4=day4; Alk4ko: 0=no knockout, 1=knockout; Alk5ko: 0=no knockout, 1=knockout
	Day	Acvr1b KO	Tgfbr1 KO	Tgfbr1	Acvr1b	Tgf-beta1	MSTN	cd68	cd163	il1b	il6	logTgfbr1	logacvr1b	logTgf-beta1	logcd68	logcd163	logil1b
	0	0	0	0.9	0.42	0.9	0.8	1.45	1.28	1.12	1.59	-0.05	-0.38	-0.05	0.16	0.11	0.05
	0	0	0	1.3	0.69	1	0.9	0.69	1.15	0.53	1.15	0.11	-0.16	0	-0.16	0.06	-0.28
	0	0	0	0.9	0.7	0.7	0.8	0.43	0.65	0.21	0.83	-0.05	-0.15	-0.15	-0.36	-0.19	-0.68
	0	0	0	1.2	1.24	0.8	1.2	0.38	0.5	0.29	0.91	0.08	0.09	-0.1	-0.42	-0.3	-0.54
	0	0	0	0.9	1.34	1	1.1	0.5	0.69	0.54	0.93	-0.05	0.13	0	-0.3	-0.16	-0.27
	0	0	0	1.1	1.52	1.3	1.1	2.14	1.83	2.02	0.85	0.04	0.18	0.11	0.33	0.26	0.3
	0	0	0	0.8	1.09	1.3	1.1	1.4	0.9	2.3	0.74	-0.1	0.04	0.11	0.15	-0.05	0.36
	0	0	1	0.2	1.11	0.9	1	1.67	0.98	1.02	1.82	-0.7	0.04	-0.05	0.22	-0.01	0.01
	0	0	1	0.2	0.5	0.9	1	3.34	1.04	0.87	1.5	-0.7	-0.3	-0.05	0.52	0.02	-0.06
	0	0	1	0.2	0.95	0.8	0.9	1.21	0.71	0.33	2.12	-0.7	-0.02	-0.1	0.08	-0.15	-0.48
	0	0	1	0.2	0.84	0.6	1.2	0.54	0.57	0.39	1.25	-0.7	-0.08	-0.22	-0.27	-0.24	-0.41
	0	0	1	0.2	0.88	0.8	1.3	0.87	0.97	0.38	0.88	-0.7	-0.06	-0.1	-0.06	-0.02	-0.42
	0	0	1	0.1	0.93	0.9	1.1	0.54	0.46	0.67	1.27	-1	-0.03	-0.05	-0.27	-0.34	-0.17
	0	1	0	1.1	0.02	0.7	0.9	0.91	0.94	0.47	1.06	0.04	-1.66	-0.15	-0.04	-0.03	-0.33
	0	1	0	1	0.04	0.9	0.9	0.69	0.98	0.24	2.62	0	-1.42	-0.05	-0.16	-0.01	-0.62
	0	1	0	0.8	0.02	0.8	0.8	0.8	1.08	0.45	1.96	-0.1	-1.62	-0.1	-0.1	0.03	-0.35
	0	1	0	0.8	0.02	0.8	0.9	0.54	0.6	0.23	0.96	-0.1	-1.74	-0.1	-0.27	-0.22	-0.65
	0	1	0	0.9	0.03	0.8	1.1	0.46	0.62	0.39	0.91	-0.05	-1.55	-0.1	-0.33	-0.21	-0.41
	0	1	0	1.3	0.05	0.8	1	1.91	0.85	1.08	2.25	0.11	-1.33	-0.1	0.28	-0.07	0.03
	0	1	0	0.9	0.02	1	0.9	0.83	0.98	1.07	1.03	-0.05	-1.77	0	-0.08	-0.01	0.03
	0	1	0	1	0.03	0.8	1.1	0.76	0.83	1.04	1.03	0	-1.51	-0.1	-0.12	-0.08	0.01
	0	1	1	0.6	0.06	2.4	1	4.78	1.75	2.85	1.65	-0.22	-1.26	0.38	0.68	0.24	0.45
	0	1	1	0.5	0.06	2.8	1.3	4.34	1.4	1.82	1.33	-0.3	-1.21	0.45	0.64	0.15	0.26
	0	1	1	0.5	0.02	2.4	1.1	4.51		1.83	1.06	-0.3	-1.72	0.38	0.65		0.26
	0	1	1	0.9	0.28	1.8	1.9	2.71	1.46	1.54	1.16	-0.05	-0.55	0.26	0.43	0.16	0.19
	0	1	1	0.9	0.19	1.8	2	3.49	1.46	2.54	1.45	-0.05	-0.72	0.26	0.54	0.17	0.41
	2	0	0	1.1	0.18	7.4	0.1	82.12	1.37	5.93	9.71	0.04	-0.75	0.87	1.91	0.14	0.77
	2	0	0	1.2	0.09	6.7	0.2	92.6	2	14.35	22.49	0.08	-1.04	0.83	1.97	0.3	1.16
	2	0	0	1.4	0.29	6.4	0.2	77.79	1.23	2.4	6.36	0.15	-0.55	0.81	1.89	0.09	0.38
	2	0	0	1.3	0.18	6.7	0.2	82.54	0.89	18	13.94	0.11	-0.75	0.83	1.92	-0.05	1.26
	2	0	0	1.5	0.22	6.5	0.2	87.95	0.83	6.46	8.69	0.18	-0.67	0.81	1.94	-0.08	0.81
	2	0	0	0.9	0.18	11.9	0.1	90.53	1.71	18.19	14.78	-0.05	-0.74	1.08	1.96	0.23	1.26
	2	0	0	1	0.11	9.7	0	121.47	0.98	17.35	11.72	0	-0.97	0.99	2.08	-0.01	1.24
	2	0	1	1.3	0.17	7	0.1	91.9	2.93	10.22	10.51	0.11	-0.77	0.85	1.96	0.47	1.01
	2	0	1	0.7	0.24	5.4	0.4	51.83	1.33	3.85	7.9	-0.15	-0.63	0.73	1.71	0.12	0.59
	2	0	1	1.1	0.3	4	0.3	73.09	1.55	6.66	7.46	0.04	-0.52	0.6	1.86	0.19	0.82
	2	0	1	1.5	0.45	3.6	0.6	46.02	0.94	2.3	4.29	0.18	-0.35	0.56	1.66	-0.03	0.36
	2	0	1	1.1	0.25	7.4	0.3	87.7	1.44	8.93	10.66	0.04	-0.61	0.87	1.94	0.16	0.95
	2	0	1	1	0.32	8.9	0.1	86.74	1.96	11.59	8.06	0	-0.5	0.95	1.94	0.29	1.06
	2	1	0	1.3	0.09	8.6	0.1	80.05	0.69	9.67	11.34	0.11	-1.03	0.93	1.9	-0.16	0.99
	2	1	0	1.4	0.26	7.8	0.2	81.8	1.06	10.79	13.25	0.15	-0.58	0.89	1.91	0.03	1.03
	2	1	0	1.2	0.18	6.6	0.2	68.99	1.21	8.27	10.92	0.08	-0.74	0.82	1.84	0.08	0.92
	2	1	0	1.5	0.09	7.2	0.2	79.39	0.71	4.32	10.2	0.18	-1.03	0.86	1.9	-0.15	0.64
	2	1	0	1.1	0.09	6.9	0.2	78.41	0.94	6.88	7.52	0.04	-1.06	0.84	1.89	-0.03	0.84
	2	1	0	1.7	0.19	9.5	0.1	115.54	1.57	18.81	18.76	0.23	-0.73	0.98	2.06	0.2	1.27
	2	1	0	1.5	0.06	7.9	0.2	83.61	1.24	12.28	10.03	0.18	-1.25	0.9	1.92	0.09	1.09
	2	1	0	1.6	0.12	5.8	0.5	63.91	1.24	7.72	8.44	0.2	-0.92	0.76	1.81	0.09	0.89
	2	1	1	3.6	0.59	10	1.5	121.95	1.9	13.5	9.43	0.56	-0.23	1	2.09	0.28	1.13
	2	1	1	1.9	0.22	8.4	0.8	62.33	1.35	3.01	5.57	0.28	-0.66	0.92	1.79	0.13	0.48
	2	1	1	2	0.2	8.1	0.2	88.46	1.93	15.45	18.91	0.3	-0.71	0.91	1.95	0.28	1.19
	2	1	1	2.2	0.2	10.4	0.1	100.1	1.81	19.22	13.84	0.34	-0.69	1.02	2	0.26	1.28
	2	1	1	1.6	0.1	3.9	0.7	31.15	1.02	2.28	4.28	0.2	-1	0.59	1.49	0.01	0.36
	4	0	0	1.2	0.22	4.3	0.2	23.08	0.67	1.9	1.93	0.08	-0.66	0.63	1.36	-0.18	0.28
	4	0	0	0.9	0.21	3.4	0.2	12.45	0.61	2.35	1.99	-0.05	-0.68	0.53	1.09	-0.22	0.37
	4	0	0	1.6	0.18	4.2	0.2	25.81	1.13	0.88	2.48	0.2	-0.75	0.62	1.41	0.05	-0.05
	4	0	0	1.1	0.15	3.8	0.2	20.25	0.51	1.99	2.41	0.04	-0.82	0.58	1.31	-0.29	0.3
	4	0	0	1.3	0.19	3.7	0.2	18.63	0.76	1.85	3	0.11	-0.71	0.57	1.27	-0.12	0.27
	4	0	0	1.5	0.54	4.7	0.3	16.75	1.13	2.76	1.87	0.18	-0.27	0.67	1.22	0.05	0.44
	4	0	0	0.8	0.54	3.9	0.3	9.11	0.75	2.36	2.01	-0.1	-0.27	0.59	0.96	-0.13	0.37
	4	0	0	0.9	0.29	5.5	0.1	13.77	0.32	6.33	3.23	-0.05	-0.54	0.74	1.14	-0.5	0.8
	4	0	1	1.1	0.24	3.6	0.2	17.99	0.96	1.3	1.45	0.04	-0.62	0.56	1.25	-0.02	0.11
	4	0	1	1.4	0.36	3.7	0.3	24.08	0.97	1.8	2	0.15	-0.44	0.57	1.38	-0.01	0.26
	4	0	1	0.9	0.15	3.7	0.1	23.96	0.97	2.39	3.49	-0.05	-0.83	0.57	1.38	-0.01	0.38
	4	0	1	1.4	0.23	3.9	0.2	22.12	0.85	2.07	1.85	0.15	-0.64	0.59	1.34	-0.07	0.32
	4	0	1	1.7	0.21	5.1	0.2	32.44	0.8	1.38	2.63	0.23	-0.69	0.71	1.51	-0.09	0.14
	4	0	1	0.8	0.3	6.1	0.2	17.28	0.51	2.86	2.08	-0.1	-0.52	0.79	1.24	-0.29	0.46
	4	1	0	1.3	0.1	5	0.1	21.36	0.36	4.95	3.5	0.11	-1	0.7	1.33	-0.44	0.69
	4	1	0	0.6	0.09	3.7	0.2	10.51	0.42	2.03	1.91	-0.22	-1.07	0.57	1.02	-0.38	0.31
	4	1	0	1	0.07	3.6	0.2	16.01	0.5	2.18	2.12	0	-1.14	0.56	1.2	-0.3	0.34
	4	1	0	0.8	0.07	3.8	0.2	14.17	0.29	2.37	1.93	-0.1	-1.15	0.58	1.15	-0.54	0.37
	4	1	0	1.6	0.12	3.9	0.2	24.59	1.04	2.09	2.05	0.2	-0.93	0.59	1.39	0.02	0.32
	4	1	0	1.1	0.13	4.7	0.2	15.97	0.5	3.69	2.03	0.04	-0.88	0.67	1.2	-0.3	0.57
	4	1	0	2	0.13	5.8	0.1	33.09	1.06	4.67	2.65	0.3	-0.9	0.76	1.52	0.03	0.67
	4	1	0	1.6	0.06	5.8	0.2	29.38	0.74	3.83	1.88	0.2	-1.19	0.76	1.47	-0.13	0.58
	4	1	1	1.7	0.17	5.4	0.4	23.11	1.33	3.31	2.51	0.23	-0.76	0.73	1.36	0.12	0.52
	4	1	1	2.6	0.24	7	0.5	26.83	1.03	1.95	1.64	0.41	-0.62	0.85	1.43	0.01	0.29
	4	1	1	1.5	0.08	5.6	0.1	23.05	0.81	4.04	1.89	0.18	-1.1	0.75	1.36	-0.09	0.61
	4	1	1	3.1	0.21	6.3	0.5	30	1.31	3.77	4.08	0.49	-0.68	0.8	1.48	0.12	0.58
	4	1	1	5	0.2	8.8	0.2	67	1.51	4.6	3.77	0.7	-0.69	0.94	1.83	0.18	0.66
	4	1	1	3	0.26	6.2	0.3	33.53	1.48	6.22	3.71	0.48	-0.59	0.79	1.53	0.17	0.79
