# Supplementary material for: Lack of Tgfbr1 and Acvr1b synergistically stimulates myofibre hypertrophy and accelerates muscle regeneration
Source: eLife. 2022 Mar 24;11:e77610. doi: 10.7554/eLife.77610 (PMC9005187; doi:10.7554/eLife.77610)
Supplement: Figure 5—source data 1. [file elife-77610-fig5-data1.xlsx]

## Sheet: Figure 5 B
DATA SUMMARY	CSA + regeneration index regenerating fibres														RAW DATA
																	RI	CSA regenerating fibres
	Control		Acvr1bfl/fl		Tgfbr1fl/fl		Acvr1bfl/fl:Tgfbr1fl/fl								Control		1.489	399.71
	Mean	SEM	Mean	SEM	Mean	SEM	Mean	SEM							Control		1.68	452.437
CSA	423.02	19.94	342.02	15.84	301.47	39.64	534.79	45.397							Control		1.786	321.881
RI	1.6	0.05	1.4	0.04	1.3	0.04	1.5	0.051034							Control		1.696	511.691
N	8		8		6		6								Control		1.671	416.962
STATISTICS															Control		1.346	385.031
Kruskall Wallis															Control		1.547	445.11
	Hypothesis Test Summary														Control		1.61	451.378
		Null Hypothesis	Test	Sig.	Decision										Tgfbr1fl/fl		1.34	266.388
	1	The distribution of RI is the same across categories of group.	Independent-Samples Kruskal-Wallis Test	0.002	Reject the null hypothesis.										Tgfbr1fl/fl		1.281	265.265
	2	The distribution of CSAreg is the same across categories of group.	Independent-Samples Kruskal-Wallis Test	0.002	Reject the null hypothesis.										Tgfbr1fl/fl		1.53676	218.619
	Asymptotic significances are displayed. The significance level is ,050.														Tgfbr1fl/fl		1.263	281.139
															Tgfbr1fl/fl		1.307	283.594
CSA															Tgfbr1fl/fl		1.297	493.808
Pairwise Comparisons of group															Acvr1bfl/fl		1.322	352.386
Sample 1-Sample 2	Test Statistic	Std. Error	Std. Test Statistic	Sig.	Adj. Sig.a										Acvr1bfl/fl		1.32	282.449
Tgfbr1*Acvr1b	-4.125	4.443	-0.929	0.353	1										Acvr1bfl/fl		1.413	427.323
Tgfbr1*CTL	11.5	4.443	2.589	0.01	0.058										Acvr1bfl/fl		1.469	304.785
Tgfbr1*Acvr1b:Tgfbr1	-16.5	4.749	-3.474	0.001	0.003										Acvr1bfl/fl		1.154	338.777
Acvr1b*CTL	7.375	4.113	1.793	0.073	0.438										Acvr1bfl/fl		1.329	343.447
Acvr1b*Acvr1b:Tgfbr1	-12.375	4.443	-2.786	0.005	0.032										Acvr1bfl/fl		1.39	372.817
CTL*Acvr1b:Tgfbr1	-5	4.443	-1.125	0.26	1										Acvr1bfl/fl		1.439	314.14
Each row tests the null hypothesis that the Sample 1 and Sample 2 distributions are the same.															Acvr1bfl/fl:Tgfbr1fl/fl		1.436	639.53
Asymptotic significances (2-sided tests) are displayed. The significance level is ,05.															Acvr1bfl/fl:Tgfbr1fl/fl		1.663	535.048
a. Significance values have been adjusted by the Bonferroni correction for multiple tests.															Acvr1bfl/fl:Tgfbr1fl/fl		1.479	569.228
															Acvr1bfl/fl:Tgfbr1fl/fl		1.392	398.447
RI															Acvr1bfl/fl:Tgfbr1fl/fl		1.333	408.6
Pairwise Comparisons of group															Acvr1bfl/fl:Tgfbr1fl/fl		1.596	657.903
Sample 1-Sample 2	Test Statistic	Std. Error	Std. Test Statistic	Sig.	Adj. Sig.a
Tgfbr1*Acvr1b	-2.792	4.443	-0.628	0.53	1
Tgfbr1*CTL	-9.5	4.749	-2	0.045	0.273
Tgfbr1*Acvr1b:Tgfbr1	15.167	4.443	3.414	0.001	0.004
Acvr1b*CTL	-6.708	4.443	-1.51	0.131	0.786
Acvr1b*Acvr1b:Tgfbr1	12.375	4.113	3.009	0.003	0.016
CTL*Acvr1b:Tgfbr1	5.667	4.443	1.276	0.202	1
Each row tests the null hypothesis that the Sample 1 and Sample 2 distributions are the same.
Asymptotic significances (2-sided tests) are displayed. The significance level is ,05.
a. Significance values have been adjusted by the Bonferroni correction for multiple tests.

## Sheet: Figure 5 C
	raw data	marcophage cells per mm2
		day 2	day4		Tests of Normality
	control	1233.79	1370.36		group		Kolmogorov-Smirnova			Shapiro-Wilk
	control	652.216	1101.94				Statistic	df	Sig.	Statistic	df	Sig.
	control	809.972	1257.34		f4_80	control day2	0.159174	7	.200*	0.949251	7	0.722872
	control	447.368	1193.77			dKO day2	0.276425	4		0.899975	4	0.430936
	control	838.227	972.437			control day4	0.165917	7	.200*	0.98016	7	0.960309
	control	1179.64	1217.31			dKO day4	0.196213	6	.200*	0.9522	6	0.758052
	control	287.257	1167.87		*. This is a lower bound of the true significance.
	Acvr1bfl/fl:Tgfbr1fl/fl	894.736	1815.37		a. Lilliefors Significance Correction
	Acvr1bfl/fl:Tgfbr1fl/fl	955.955	1624.65
	Acvr1bfl/fl:Tgfbr1fl/fl	609.834	2112.05		day 2
	Acvr1bfl/fl:Tgfbr1fl/fl	833.518	1246.74		Independent Samples Test
	Acvr1bfl/fl:Tgfbr1fl/fl		1125.48				Levene's Test for Equality of Variances		t-test for Equality of Means
	Acvr1bfl/fl:Tgfbr1fl/fl		1353.88				F	Sig.	t	df	Sig. (2-tailed)	Mean Difference	Std. Error Difference	95% Confidence Interval of the Difference
														Lower	Upper
					f4_80	Equal variances assumed	2.48087	0.149691	-0.240443	9	0.815374	-45.1573	187.809	-470.01	379.695
						Equal variances not assumed			-0.295777	8.69097	0.774345	-45.1573	152.673	-392.409	302.095
					day 4
					Independent Samples Test
							Levene's Test for Equality of Variances		t-test for Equality of Means
							F	Sig.	t	df	Sig. (2-tailed)	Mean Difference	Std. Error Difference	95% Confidence Interval of the Difference
														Lower	Upper
					f4_80	Equal variances assumed	8.96833	0.0121944	-2.42864	11	0.0334906	-51.4405	21.1808	-98.0591	-4.82182
						Equal variances not assumed			-2.26963	5.94667	0.064091	-51.4405	22.6647	-107.02	4.13878

## Sheet: Figure 5 D PCR
DATA SUMMARY
N						Control		Acvr1bfl/fl		Tgfbr1fl/fl		Acvr1bfl/fl:Tgfbr1fl/fl
Control	Day 0	7				Mean	SEM	Mean	SEM	Mean	SEM	Mean	SEM			Post HOC Bonferroni Pvalues				Hgf	Mgf	Igf1ea	Vegf	Pax7	Myod	Myog	Atrogin-1
	Day 2	7			Hgf											Day0	Control	Tgfbr1		1	1	0.91088	0.0359453	0.836158	1	0.466167	1
	Day 4	8			Day 0	1	0.08	1.1	0.12	1.2	0.18	4.8	0.87				Control	Acvr1b		1	1	1	1	1	1	1	1
Acvr1bfl/fl	Day 0	8			Day 2	27	1.31	23.3	0.55	23.2	1.79	25.8	4.26				Control	Acvr1b:Tgfbr1		1.18646e-05	0.769128	1	0.00016767	0.240429	0.0150144	6.06309e-05	1
	Day 2	8			Day 4	10.7	1.19	11.4	1.38	12.7	1.25	18.3	2.5				Acvr1b	Tgfbr1		1	1	1	0.130749	1	1	0.247432	1
	Day 4	8			Mgf												Tgfbr1	Acvr1b:Tgfbr1		0.000209924	0.00370346	1	0.000996589	0.0473005	0.0109727	3.19138e-06	1
Tgfbr1fl/fl	Day 0	6			Day 0	1	0.17	1.2	0.14	1.2	0.12	0.7	0.04				Acvr1b	Acvr1b:Tgfbr1		2.88829e-05	0.0490641	1	0.000186021	0.0551231	0.0141936	2.66725e-05	1
	Day 2	6			Day 2	3.5	0.27	2.6	0.07	2.7	0.1	2.1	0.37
	Day 4	6			Day 4	1.7	0.13	1.5	0.11	1.9	0.19	2.1	0.29			Day2	Control	Tgfbr1		0.65197	0.0965977	1	0.473941	1	1	0.521042	1
Acvr1bfl/fl:Tgfbr1fl/fl	Day 0	5			Fgf-2												Control	Acvr1b		0.0695752	0.0162648	0.117601	1	1	1	1	1
	Day 2	5			Day 0	1	0.09	1	0.06	0.9	0.07	0.9	0.1				Control	Acvr1b:Tgfbr1		1	0.0545092	1	1	0.107447	0.0523164	0.0919581	0.100537
	Day 4	6			Day 2	0.2	0.03	0.3	0.04	0.4	0.04	0.5	0.05				Acvr1b	Tgfbr1		1	3.26917	0.407209	1	1	1	1	0.23291
					Day 4	0.3	0.03	0.2	0.02	0.3	0.03	0.4	0.04				Tgfbr1	Acvr1b:Tgfbr1		1	0.635749	1	1	0.0536647	0.0373467	0.0104328	0.978638
					Igf1ea												Acvr1b	Acvr1b:Tgfbr1		1	0.500474	0.210939	1	0.0538637	0.0515243	0.0337336	0.0231815
					Day 0	1	0.15	1.2	0.11	1.3	0.15	1.2	0.06
					Day 2	1.7	0.2	1.2	0.08	1.5	0.09	1.8	0.29			Day4	Control	Tgfbr1		1	1	0.692514	1	1	1	0.790706	1
					Day 4	1.5	0.13	1.4	0.09	1.8	0.13	2.6	0.29				Control	Acvr1b		1	1	1	1	1	1	1	1
					Vegf												Control	Acvr1b:Tgfbr1		0.0582391	1	0.0141365	1	0.00613819	0.142243	0.27743	0.338935
					Day 0	1	0.08	0.9	0.07	0.7	0.02	0.5	0.02				Acvr1b	Tgfbr1		1	0.603146	0.165369	1	1	1	1	1
					Day 2	0.1	0.02	0.2	0.03	0.2	0.06	0.2	0.05				Tgfbr1	Acvr1b:Tgfbr1		0.156558	1	0.12232	1	0.00248204	0.24681	1	0.0646748
					Day 4	0.2	0.03	0.1	0.02	0.1	0.02	0.1	0.02				Acvr1b	Acvr1b:Tgfbr1		0.114451	0.347898	0.0028613	1	0.0212746	0.207336	1	0.023394
					Pax7
					Day 0	1	0.08	1	0.12	0.8	0.1	1.5	0.22
					Day 2	0.9	0.08	0.9	0.05	0.9	0.02	1.6	0.27
					Day 4	3.2	0.21	3.2	0.35	3.2	0.17	5.4	0.56
					Myod
					Day 0	1	0.12	1.1	0.11	0.9	0.15	2.1	0.3
					Day 2	1.1	0.1	1	0.1	1	0.13	1.7	0.16
					Day 4	2.3	0.15	2.3	0.17	2.4	0.25	3.9	0.76
					Myog
					Day 0	1	0.11	1	0.11	0.8	0.08	4.1	0.43
					Day 2	3.3	0.29	3	0.31	2.6	0.21	5.6	0.8
					Day 4	21.7	3.48	28	4.75	28.9	3.45	42.8	10.74
					Myh3
					Day 0	1	0.45	0.3	0.02	0.4	0.16	4.8	2.84
					Day 2	0.6	0.08	0.3	0.07	0.3	0.08	4.5	1.88
					Day 4	482.7	39.74	497.9	15.54	430.1	65.31	616.4	53.28
					Id1
					Day 0	1	0.12	0.9	0.11	0.9	0.12	1	0.11
					Day 2	0.8	0.08	0.6	0.04	0.6	0.12	0.8	0.04
					Day 4	0.7	0.13	0.6	0.05	0.7	0.07	0.7	0.09
					Murf-1
					Day 0	1	0.23	0.8	0.06	0.7	0.05	0.5	0.04
					Day 2	0.2	0.03	0.2	0.03	0.3	0.07	0.3	0.08
					Day 4	0.2	0.02	0.2	0.03	0.2	0.02	0.3	0.04
					Atrogin-1
					Day 0	1	0.2	0.7	0.08	0.7	0.12	0.7	0.04
					Day 2	0.1	0.02	0.1	0.02	0.1	0.05	0.3	0.09
					Day 4	0.1	0.03	0.1	0.02	0.1	0.01	0.3	0.05
	STATISTICS 3 way ANOVA
	Tests of Between-Subjects Effects							Tests of Between-Subjects Effects							Tests of Between-Subjects Effects							Tests of Between-Subjects Effects							Tests of Between-Subjects Effects							Tests of Between-Subjects Effects							Tests of Between-Subjects Effects
	Dependent Variable: loghgf							Dependent Variable: logmgf							Dependent Variable: logigf1ea							Dependent Variable: logvegf							Dependent Variable: logpax							Dependent Variable: logmyod							Dependent Variable: logmyog
	Source	Type III Sum of Squares	df	Mean Square	F	Sig.		Source	Type III Sum of Squares	df	Mean Square	F	Sig.		Source	Type III Sum of Squares	df	Mean Square	F	Sig.		Source	Type III Sum of Squares	df	Mean Square	F	Sig.		Source	Type III Sum of Squares	df	Mean Square	F	Sig.		Source	Type III Sum of Squares	df	Mean Square	F	Sig.		Source	Type III Sum of Squares	df	Mean Square	F	Sig.
	Corrected Model	23,669a	11	2.152	143.687	0		Corrected Model	3,045a	11	0.277	20.312	0		Corrected Model	,895a	11	0.081	6.539	0		Corrected Model	11,262a	11	1.024	27.666	0		Corrected Model	5,987a	11	0.544	49.999	0		Corrected Model	3,111a	11	0.283	17.063	0		Corrected Model	27,768a	11	2.524	106.375	0
	Intercept	61.281	1	61.281	4092.25	0		Intercept	3.395	1	3.395	249.162	0		Intercept	1.851	1	1.851	148.865	0		Intercept	31.276	1	31.276	845.123	0		Intercept	2.785	1	2.785	255.785	0		Intercept	2.265	1	2.265	136.682	0		Intercept	36.665	1	36.665	1545.08	0
	Day	19.878	2	9.939	663.708	0		Day	2.575	2	1.287	94.474	0		Day	0.494	2	0.247	19.843	0		Day	9.81	2	4.905	132.537	0		Day	5.228	2	2.614	240.1	0		Day	2.168	2	1.084	65.415	0		Day	24.156	2	12.078	508.974	0
	Acvr1b	0.341	1	0.341	22.766	0		Acvr1b	0.094	1	0.094	6.88	0.011		Acvr1b	0.005	1	0.005	0.436	0.511		Acvr1b	0.18	1	0.18	4.862	0.031		Acvr1b	0.278	1	0.278	25.518	0		Acvr1b	0.342	1	0.342	20.661	0		Acvr1b	0.845	1	0.845	35.606	0
	Tgfbr1	0.47	1	0.47	31.376	0		Tgfbr1	0.016	1	0.016	1.163	0.285		Tgfbr1	0.185	1	0.185	14.88	0		Tgfbr1	0.052	1	0.052	1.401	0.241		Tgfbr1	0.127	1	0.127	11.667	0.001		Tgfbr1	0.228	1	0.228	13.729	0		Tgfbr1	0.485	1	0.485	20.422	0
	Day * Acvr1b	0.389	2	0.195	13	0		Day * Acvr1b	0.046	2	0.023	1.7	0.19		Day * Acvr1b	0.032	2	0.016	1.271	0.287		Day * Acvr1b	0.007	2	0.003	0.093	0.911		Day * Acvr1b	0.002	2	0.001	0.075	0.928		Day * Acvr1b	0.038	2	0.019	1.159	0.32		Day * Acvr1b	0.286	2	0.143	6.032	0.004
	Day * Tgfbr1	0.433	2	0.217	14.467	0		Day * Tgfbr1	0.148	2	0.074	5.417	0.007		Day * Tgfbr1	0.054	2	0.027	2.157	0.123		Day * Tgfbr1	0.325	2	0.162	4.387	0.016		Day * Tgfbr1	0.027	2	0.013	1.237	0.297		Day * Tgfbr1	0.003	2	0.001	0.077	0.926		Day * Tgfbr1	0.071	2	0.036	1.496	0.231
	Acvr1b*Tgfbr1	0.331	1	0.331	22.099	0		Acvr1b*Tgfbr1	0.029	1	0.029	2.126	0.149		Acvr1b*Tgfbr1	0.041	1	0.041	3.263	0.075		Acvr1b*Tgfbr1	0.143	1	0.143	3.864	0.053		Acvr1b*Tgfbr1	0.26	1	0.26	23.85	0		Acvr1b*Tgfbr1	0.313	1	0.313	18.908	0		Acvr1b*Tgfbr1	0.671	1	0.671	28.257	0
	Day * ACvr1b*Tgfbr1	0.229	2	0.115	7.657	0.001		Day * ACvr1b*Tgfbr1	0.156	2	0.078	5.715	0.005		Day * ACvr1b*Tgfbr1	0.097	2	0.049	3.903	0.025		Day * ACvr1b*Tgfbr1	0.015	2	0.008	0.205	0.815		Day * ACvr1b*Tgfbr1	0	2	0	0.016	0.984		Day * ACvr1b*Tgfbr1	0.018	2	0.009	0.531	0.591		Day * ACvr1b*Tgfbr1	0.41	2	0.205	8.641	0
	Error	1.018	68	0.015				Error	0.927	68	0.014				Error	0.846	68	0.012				Error	2.516	68	0.037				Error	0.74	68	0.011				Error	1.127	68	0.017				Error	1.614	68	0.024
	Total	86.253	80					Total	7.626	80					Total	3.503	80					Total	46.046	80					Total	9.597	80					Total	6.411	80					Total	67.099	80
	Corrected Total	24.687	79					Corrected Total	3.971	79					Corrected Total	1.74	79					Corrected Total	13.779	79					Corrected Total	6.728	79					Corrected Total	4.238	79					Corrected Total	29.381	79
	a. R Squared = ,959 (Adjusted R Squared = ,952)							a. R Squared = ,767 (Adjusted R Squared = ,729)							a. R Squared = ,514 (Adjusted R Squared = ,435)							a. R Squared = ,817 (Adjusted R Squared = ,788)							a. R Squared = ,890 (Adjusted R Squared = ,872)							a. R Squared = ,734 (Adjusted R Squared = ,691)							a. R Squared = ,945 (Adjusted R Squared = ,936)
	Kruskall Wallis
	Myh3
	Hypothesis Test Summary
		Null Hypothesis	Test	Sig.	Decision
	1	The distribution of myh30 is the same across categories of GROUP.	Independent-Samples Kruskal-Wallis Test	0.012	Reject the null hypothesis.
	2	The distribution of myh32 is the same across categories of GROUP.	Independent-Samples Kruskal-Wallis Test	0.007	Reject the null hypothesis.
	1	The distribution of myh34 is the same across categories of group.	Independent-Samples Kruskal-Wallis Test	0.095	Retain the null hypothesis.	The distribution of myh34 is the same across categories of group.
	Pairwise Comparisons of GROUP							Pairwise Comparisons of GROUP
	Sample 1-Sample 2	Test Statistic	Std. Error	Std. Test Statistic	Sig.	Adj. Sig.a		Sample 1-Sample 2			Test Statistic			Std. Error		Std. Test Statistic		Sig.		Adj. Sig.a
	Acvr1bfl/fl*Tgfbr1fl/fl	1.25	4.018	0.311	0.756	1		Acvr1bfl/fl*Tgfbr1fl/fl			-0.604			4.088		-0.148		0.883		1
	Tgfbr1fl/fl*Control	-5.25	3.851	-1.363	0.173	1		Tgfbr1fl/fl*Control			-6.881			4.211		-1.634		0.102		0.614
	Acvr1bfl/fl*Acvr1bfl/fl:Tgfbr1fl/fl	-13.25	4.242	-3.124	0.002	0.011		Acvr1bfl/fl*Acvr1bfl/fl:Tgfbr1fl/fl			-13.667			4.584		-2.982		0.003		0.017
	Acvr1bfl/fl*Control	-4	4.139	-0.966	0.334	1		Acvr1bfl/fl*Control			-6.277			3.918		-1.602		0.109		0.655
	Tgfbr1fl/fl*Acvr1bfl/fl:Tgfbr1fl/fl	-12	4.505	-2.663	0.008	0.046		Tgfbr1fl/fl*Acvr1bfl/fl:Tgfbr1fl/fl			-13.062			4.315		-3.027		0.002		0.015
	Control*Acvr1bfl/fl:Tgfbr1fl/fl	8	4.357	1.836	0.066	0.398		Control*Acvr1bfl/fl:Tgfbr1fl/fl			6.786			4.432		1.531		0.126		0.755
	Each row tests the null hypothesis that the Sample 1 and Sample 2 distributions are the same.							Each row tests the null hypothesis that the Sample 1 and Sample 2 distributions are the same.
	Asymptotic significances (2-sided tests) are displayed. The significance level is ,05.							Asymptotic significances (2-sided tests) are displayed. The significance level is ,05.
	a. Significance values have been adjusted by the Bonferroni correction for multiple tests.
	Id1
	Hypothesis Test Summary
	7	The distribution of id10 is the same across categories of GROUP.	Independent-Samples Kruskal-Wallis Test	0.678	Retain the null hypothesis.
	8	The distribution of id12 is the same across categories of GROUP.	Independent-Samples Kruskal-Wallis Test	0.066	Retain the null hypothesis.
	5	The distribution of id14 is the same across categories of group.	Independent-Samples Kruskal-Wallis Test	0.425	Retain the null hypothesis.
	Murf1
	Hypothesis Test Summary
	5	The distribution of murf10 is the same across categories of GROUP.	Independent-Samples Kruskal-Wallis Test	0.013	Reject the null hypothesis.
	6	The distribution of murf12 is the same across categories of GROUP.	Independent-Samples Kruskal-Wallis Test	0.167	Retain the null hypothesis.
	4	The distribution of murf14 is the same across categories of group.	Independent-Samples Kruskal-Wallis Test	0.096	Retain the null hypothesis.
	Pairwise Comparisons of GROUP
	Sample 1-Sample 2	Test Statistic	Std. Error	Std. Test Statistic	Sig.	Adj. Sig.a
	Tgfbr1fl/fl*Acvr1bfl/fl:Tgfbr1fl/fl	9.333	4.631	2.016	0.044	0.263
	Acvr1bfl/fl*Acvr1bfl/fl:Tgfbr1fl/fl	11.625	4.36	2.667	0.008	0.046
	Control*Acvr1bfl/fl:Tgfbr1fl/fl	-14	4.478	-3.127	0.002	0.011
	Acvr1bfl/fl*Tgfbr1fl/fl	-2.292	4.13	-0.555	0.579	1
	Tgfbr1fl/fl*Control	-4.667	4.255	-1.097	0.273	1
	Acvr1bfl/fl*Control	-2.375	3.958	-0.6	0.548	1
	Each row tests the null hypothesis that the Sample 1 and Sample 2 distributions are the same.
	Asymptotic significances (2-sided tests) are displayed. The significance level is ,05.
	a. Significance values have been adjusted by the Bonferroni correction for multiple tests.
	Fgf-2
	Hypothesis Test Summary
	3	The distribution of fgf20 is the same across categories of GROUP.	Independent-Samples Kruskal-Wallis Test	0.539	Retain the null hypothesis.
	4	The distribution of fgf22 is the same across categories of GROUP.	Independent-Samples Kruskal-Wallis Test	0.022	Reject the null hypothesis.
	3	The distribution of fgf24 is the same across categories of group.	Independent-Samples Kruskal-Wallis Test	0.095	Retain the null hypothesis.
	Pairwise Comparisons of GROUP
	Sample 1-Sample 2	Test Statistic	Std. Error	Std. Test Statistic	Sig.	Adj. Sig.a
	Acvr1bfl/fl*Control	5.071	3.958	1.281	0.2	1
	Tgfbr1fl/fl*Control	8.405	4.255	1.975	0.048	0.29
	Control*Acvr1bfl/fl:Tgfbr1fl/fl	13.371	4.479	2.986	0.003	0.017
	Acvr1bfl/fl*Tgfbr1fl/fl	3.333	4.131	0.807	0.42	1
	Acvr1bfl/fl*Acvr1bfl/fl:Tgfbr1fl/fl	-8.3	4.36	-1.904	0.057	0.342
	Tgfbr1fl/fl*Acvr1bfl/fl:Tgfbr1fl/fl	-4.967	4.631	-1.072	0.284	1
	Each row tests the null hypothesis that the Sample 1 and Sample 2 distributions are the same.
	Asymptotic significances (2-sided tests) are displayed. The significance level is ,05.
	a. Significance values have been adjusted by the Bonferroni correction for multiple tests.
[truncated: 6 more columns]

## Sheet: Figure 5 D PCR RAW DATA
	0=control		PCR RAW DATA FOLD CHANGE
	1=KO
	Day	Acvr1bKO	Tgfbr1KO	hgf	MGF	fgf2	igf1ea	vegf	PAX7	myod	myog	myh3	id1	murf1	atrogin-1	loghgf	logmgf	logigf1ea	logvegf	logpax	logmyod	logmyog	logatrogin1
	0	0	0	1.34	0.71	0.87	0.56	0.86	0.68	0.7	0.7	0.3	0.8	2.38	2.1	0.13	-0.15	-0.25	-0.06	-0.17	-0.16	-0.15	0.32
	0	0	0	0.78	1.11	1.47	1.17	0.78	0.87	0.67	1.2	0.3	1.58	0.9	1.12	-0.11	0.05	0.07	-0.11	-0.06	-0.17	0.08	0.05
	0	0	0	1.13	0.92	0.85	0.94	0.88	0.94	0.81	0.6	0.2	1.27	0.73	0.91	0.05	-0.04	-0.03	-0.06	-0.03	-0.09	-0.22	-0.04
	0	0	0	0.79	0.49	0.81	0.56	1.09	1.04	1.15	1.1	0.7	0.72	0.9	1.03	-0.1	-0.31	-0.25	0.04	0.02	0.06	0.04	0.01
	0	0	0	1.04	0.7	0.86	0.91	0.83	1.05	0.87	0.9	0.2	1.03	0.68	0.68	0.02	-0.16	-0.04	-0.08	0.02	-0.06	-0.05	-0.17
	0	0	0	1.08	1.21	1.2	1.22	1.25	1.31	1.51	1.1	2.3	0.91	0.82	0.75	0.03	0.08	0.08	0.1	0.12	0.18	0.04	-0.12
	0	0	0	0.83	1.86	0.95	1.65	1.32	1.1	1.3	1.4	3.1	0.69	0.6	0.41	-0.08	0.27	0.22	0.12	0.04	0.11	0.15	-0.39
	0	0	1	1.32	1.35	0.88	1.83	0.73	0.84	1.15	0.7	0.4	1	0.77	1.2	0.12	0.13	0.26	-0.14	-0.08	0.06	-0.15	0.08
	0	0	1	2.02	0.99	0.6	1.29	0.76	0.65	0.98	0.8	0.2	0.72	0.75	0.81	0.3	-0.01	0.11	-0.12	-0.19	-0.01	-0.1	-0.09
	0	0	1	1.03	0.98	1	0.85	0.72	0.63	0.6	0.6	0.2	0.81	0.8	0.68	0.01	-0.01	-0.07	-0.14	-0.2	-0.22	-0.22	-0.17
	0	0	1	1.02	0.82	0.95	1.02	0.67	0.77	0.81	0.6	0.2	1.46	0.6	0.48	0.01	-0.09	0.01	-0.17	-0.11	-0.09	-0.22	-0.32
	0	0	1	0.71	1.58	1.02	1.57	0.8	1.3	1.53	1.1	0.3	0.89	0.47	0.38	-0.15	0.2	0.2	-0.1	0.11	0.18	0.04	-0.42
	0	0	1	1.02	1.38	0.7	1.26	0.66	0.75	0.53	0.6	1.2	0.7	0.75	0.5	0.01	0.14	0.1	-0.18	-0.12	-0.28	-0.22	-0.3
	0	1	0	1.41	1.22	1.29	1.25	1.11	0.95	0.64	0.9	0.4	0.43	0.68	0.87	0.15	0.09	0.1	0.04	-0.02	-0.2	-0.05	-0.06
	0	1	0	0.91	1.13	0.83	1.1	0.83	0.86	0.92	0.9	0.2	0.67	1.14	0.74	-0.04	0.05	0.04	-0.08	-0.06	-0.04	-0.05	-0.13
	0	1	0	1.01	0.99	0.86	0.9	0.78	0.81	0.91	0.6	0.2	0.7	0.85	0.59	0	0	-0.05	-0.11	-0.09	-0.04	-0.22	-0.23
	0	1	0	0.69	0.64	1.21	0.79	0.73	0.82	1.29	1.4	0.2	1.22	0.73	0.84	-0.16	-0.19	-0.1	-0.13	-0.09	0.11	0.15	-0.08
	0	1	0	0.89	1.19	0.87	1.19	0.7	0.84	1.65	0.9	0.2	0.98	0.55	0.46	-0.05	0.07	0.07	-0.15	-0.08	0.22	-0.05	-0.34
	0	1	0	1.11	1.51	1.06	1.43	1.23	1.06	1.05	1.5	0.3	1.11	0.79	0.79	0.04	0.18	0.15	0.09	0.02	0.02	0.18	-0.1
	0	1	0	1.75	0.77	0.99	0.87	0.95	1.11	1.17	1.1	0.3	1.27	0.78	1.15	0.24	-0.12	-0.06	-0.02	0.05	0.07	0.04	0.06
	0	1	0	1.17	1.92	0.9	1.7	1.07	1.8	0.89	1	0.3	0.56	0.72	0.48	0.07	0.28	0.23	0.03	0.26	-0.05	0	-0.32
	0	1	1	8.19	0.62	0.75	1.09	0.47	1	1.78	4.5	1.6	1.24	0.57	0.59	0.91	-0.21	0.04	-0.33	0	0.25	0.65	-0.23
	0	1	1	4.78	0.67	0.97	1.16	0.44	1.23	1.53	4.2	16.1	0.74	0.39	0.73	0.68	-0.17	0.07	-0.36	0.09	0.18	0.62	-0.14
	0	1	1	4.13	0.67	0.83	1.29	0.54	1.17	3.06	2.4	2.3	0.77	0.57	0.65	0.62	-0.18	0.11	-0.27	0.07	0.49	0.38	-0.19
	0	1	1	3.66	0.56	0.57	1.04	0.4	2.23	1.54	4.4	1.7	1.01	0.4	0.75	0.56	-0.25	0.02	-0.39	0.35	0.19	0.64	-0.12
	0	1	1	3.44	0.78	1.14	1.33	0.48	1.68	2.49	4.9	2.2	1.25	0.49	0.81	0.54	-0.11	0.12	-0.32	0.23	0.4	0.69	-0.09
	2	0	0	26.02	3.04	0.26	1.44	0.11	0.69	1.12	2.7	0.4	0.93	0.24	0.15	1.42	0.48	0.16	-0.95	-0.16	0.05	0.43	-0.82
	2	0	0	32.09	4.4	0.29	2.42	0.14	0.97	1.33	3.5	0.6	1.01	0.25	0.12	1.51	0.64	0.38	-0.86	-0.02	0.12	0.54	-0.92
	2	0	0	26.49	3.81	0.33	2.07	0.16	1.27	0.68	4.2	0.9	0.62	0.28	0.15	1.42	0.58	0.32	-0.79	0.1	-0.17	0.62	-0.81
	2	0	0	22.68	3.04	0.27	1.34	0.12	0.82	0.87	3	0.3	1.12	0.24	0.12	1.36	0.48	0.13	-0.91	-0.09	-0.06	0.48	-0.91
	2	0	0	29.65	4.48	0.25	2.38	0.19	1.12	1.43	4.4	0.7	0.61	0.17	0.1	1.47	0.65	0.38	-0.72	0.05	0.16	0.64	-1.01
	2	0	0	23.22	2.61	0.16	1.22	0.09	0.65	0.8	2.2	0.4	0.91	0.08	0.06	1.37	0.42	0.09	-1.04	-0.19	-0.09	0.34	-1.25
	2	0	0	29.14	3.28	0.13	1.35	0.06	0.87	1.13	3	0.7	0.67	0.08	0.04	1.46	0.52	0.13	-1.25	-0.06	0.05	0.48	-1.36
	2	0	1	24.08	2.75	0.27	1.36	0.08	0.87	0.86	2.1	0.3	0.94	0.22	0.09	1.38	0.44	0.13	-1.09	-0.06	-0.06	0.32	-1.06
	2	0	1	20.89	2.34	0.4	1.23	0.21	0.87	0.98	3.3	0.7	0.56	0.39	0.15	1.32	0.37	0.09	-0.68	-0.06	-0.01	0.52	-0.83
	2	0	1	25.92	2.96	0.44	1.73	0.19	0.8	0.7	2.3	0.1	0.7	0.3	0.18	1.41	0.47	0.24	-0.73	-0.1	-0.15	0.36	-0.74
	2	0	1	15.43	2.73	0.52	1.75	0.52	0.86	1.07	2.3	0.2	0.48	0.5	0.37	1.19	0.44	0.24	-0.29	-0.07	0.03	0.36	-0.43
	2	0	1	27.28	2.44	0.36	1.37	0.21	0.84	0.78	3.1	0.2	0.68	0.24	0.13	1.44	0.39	0.14	-0.67	-0.08	-0.11	0.49	-0.89
	2	0	1	25.45	2.87	0.26	1.37	0.18	0.97	1.56	2.4	0.5	0.52	0.16	0.08	1.41	0.46	0.14	-0.74	-0.01	0.19	0.38	-1.08
	2	1	0	21.75	2.38	0.21	1.33	0.08	0.94	1.29	1.9	0.2	0.76	0.08	0.05	1.34	0.38	0.12	-1.11	-0.03	0.11	0.28	-1.28
	2	1	0	23.82	2.29	0.25	1.29	0.07	1.04	1.09	2.9	0.5	0.76	0.12	0.06	1.38	0.36	0.11	-1.14	0.02	0.04	0.46	-1.25
	2	1	0	24.89	2.73	0.35	1.21	0.18	0.8	1.17	2.7	0.2	0.61	0.17	0.06	1.4	0.44	0.08	-0.74	-0.1	0.07	0.43	-1.21
	2	1	0	25.28	2.52	0.45	1.51	0.17	1.21	1.2	3.6	0.7	0.68	0.22	0.09	1.4	0.4	0.18	-0.78	0.08	0.08	0.56	-1.03
	2	1	0	20.98	2.74	0.39	1.1	0.18	0.92	1.28	2.9	0.5	0.57	0.16	0.09	1.32	0.44	0.04	-0.74	-0.03	0.11	0.46	-1.04
	2	1	0	24.25	2.79	0.24	1.13	0.06	0.83	0.55	2	0.2	0.71	0.08	0.03	1.38	0.45	0.05	-1.24	-0.08	-0.26	0.3	-1.51
	2	1	0	23.13	2.75	0.3	1.43	0.18	0.89	0.71	3.1	0.3	0.48	0.19	0.07	1.36	0.44	0.15	-0.74	-0.05	-0.15	0.49	-1.17
	2	1	0	22.02	2.66	0.48	0.78	0.3	0.83	0.9	4.6	0.2	0.52	0.34	0.22	1.34	0.42	-0.11	-0.52	-0.08	-0.04	0.66	-0.66
	2	1	1	39.43	3.51	0.54	2.78	0.24	2.17	1.66	6.9	0.5	0.8	0.45	0.3	1.6	0.55	0.44	-0.63	0.34	0.22	0.84	-0.52
	2	1	1	21.45	1.91	0.59	2.15	0.28	2.2	2.15	7.6	6.2	0.85	0.51	0.65	1.33	0.28	0.33	-0.55	0.34	0.33	0.88	-0.19
	2	1	1	28.47	1.84	0.29	1.56	0.07	0.9	1.31	3.1	1.7	0.72	0.16	0.15	1.45	0.26	0.19	-1.18	-0.05	0.12	0.49	-0.82
	2	1	1	25.94	2.21	0.43	1.47	0.05	1.56	1.89	5.4	11	0.91	0.14	0.12	1.41	0.34	0.17	-1.29	0.19	0.28	0.73	-0.93
	2	1	1	13.47	1.26	0.5	1.12	0.16	1.12	1.36	4.7	3	0.72	0.26	0.3	1.13	0.1	0.05	-0.8	0.05	0.13	0.67	-0.52
	4	0	0	13.04	2.02	0.29	1.95	0.18	3.9	2.39	20.1	381	0.57	0.17	0.11	1.12	0.3	0.29	-0.76	0.59	0.38	1.3	-0.94
	4	0	0	6.59	1.64	0.22	2.04	0.15	2.49	1.91	12.5	477.6	0.47	0.17	0.13	0.82	0.22	0.31	-0.82	0.4	0.28	1.1	-0.88
	4	0	0	15.55	2.1	0.22	1.54	0.13	3.91	2.94	41.6	326.9	1.55	0.28	0.16	1.19	0.32	0.19	-0.89	0.59	0.47	1.62	-0.81
	4	0	0	12.16	1.89	0.24	1.36	0.08	3.53	2.05	22	428.7	0.48	0.12	0.07	1.08	0.28	0.13	-1.09	0.55	0.31	1.34	-1.13
	4	0	0	11.58	1.9	0.21	1.54	0.11	3.31	1.97	28.6	482.6	0.46	0.14		1.06	0.28	0.19	-0.97	0.52	0.29	1.46
	4	0	0	12.03	1.38	0.41	1.28	0.25	3.39	2.85	21.2	485.3	0.63	0.3	0.31	1.08	0.14	0.11	-0.61	0.53	0.45	1.33	-0.51
	4	0	0	5.55	1.03	0.35	1.01	0.25	2.36	2.12	10.2	612.2	0.52	0.22	0.16	0.74	0.01	0.01	-0.6	0.37	0.33	1.01	-0.79
	4	0	0	9.01	1.41	0.13	1.23	0.06	2.79	1.99	17.7	667.4	0.71	0.12	0.07	0.95	0.15	0.09	-1.24	0.45	0.3	1.25	-1.13
	4	0	1	9.1	1.69	0.24	1.88	0.16	2.8	1.87	23.1	393.7	0.59	0.19	0.11	0.96	0.23	0.27	-0.8	0.45	0.27	1.36	-0.97
	4	0	1	12.86	1.57	0.38	1.73	0.18	2.93	2.44	28.7	337.8	0.89	0.13	0.17	1.11	0.2	0.24	-0.75	0.47	0.39	1.46	-0.77
	4	0	1	13.88	2.36	0.23	1.9	0.07	3.72	1.98	22.8	384.2	0.66	0.16	0.1	1.14	0.37	0.28	-1.15	0.57	0.3	1.36	-1.02
	4	0	1	13.71	2	0.33	2.04	0.19	3.03	3.49	35.4	520.9	0.71	0.22	0.13	1.14	0.3	0.31	-0.72	0.48	0.54	1.55	-0.9
	4	0	1	17.27	2.34	0.33	2.09	0.16	3.64	2.42	42.3	243.9	0.97	0.13	0.17	1.24	0.37	0.32	-0.8	0.56	0.38	1.63	-0.78
	4	0	1	9.48	1.2	0.19	1.23	0.1	2.81	1.97	20.9	700.4	0.57	0.24	0.13	0.98	0.08	0.09	-0.98	0.45	0.29	1.32	-0.89
	4	1	0	12.8	1.47	0.23	1.51	0.07	3.36	2.43	29.9	459	0.86	0.17	0.07	1.11	0.17	0.18	-1.18	0.53	0.38	1.48	-1.14
	4	1	0	6.82	1.21	0.18	1.29	0.13	2.08	2.47	13	534.4	0.57	0.14	0.09	0.83	0.08	0.11	-0.89	0.32	0.39	1.11	-1.07
	4	1	0	8.72	1.19	0.24	1.52	0.07	2.68	1.48	18.3	487.5	0.52	0.18	0.1	0.94	0.08	0.18	-1.14	0.43	0.17	1.26	-0.99
	4	1	0	8.87	1.16	0.18	1.02	0.11	2.31	2.62	17.1	527	0.48	0.03	0.09	0.95	0.07	0.01	-0.94	0.36	0.42	1.23	-1.06
	4	1	0	14.06	2.16	0.25	1.84	0.15	3.49	2.6	48.8	420.7	0.79	0.13	0.1	1.15	0.33	0.26	-0.83	0.54	0.42	1.69	-1.02
	4	1	0	7.74	1.51	0.24	1.45	0.15	2.77	1.57	17.6	558.2	0.5	0.28	0.2	0.89	0.18	0.16	-0.82	0.44	0.2	1.25	-0.71
	4	1	0	17.61	1.6	0.24	1.22	0.11	5.22	2.65	42.4	490.2	0.79	0.17	0.06	1.25	0.21	0.09	-0.94	0.72	0.42	1.63	-1.21
	4	1	0	14.83	1.53	0.32	1.48	0.24	3.67	2.65	36.6	506.2	0.67	0.25	0.17	1.17	0.19	0.17	-0.63	0.56	0.42	1.56	-0.77
	4	1	1	13.73	1.21	0.44	1.71	0.14	3.7	2.16	19.7	504.6	0.48	0.27	0.27	1.14	0.08	0.23	-0.84	0.57	0.33	1.29	-0.56
	4	1	1	15.6	1.64	0.42	2.39	0.14	5.48	2.45	19.9	470.1	0.59	0.38	0.26	1.19	0.22	0.38	-0.85	0.74	0.39	1.3	-0.58
	4	1	1	13.14	1.66	0.16	1.97	0.05	4.34	2.77	31.8	765.7	0.45	0.17	0.11	1.12	0.22	0.29	-1.35	0.64	0.44	1.5	-0.96
	4	1	1	18.43	2.33	0.46	2.56	0.15	6.25	3.68	42.8	660.6	0.85	0.42	0.47	1.27	0.37	0.41	-0.82	0.8	0.57	1.63	-0.33
	4	1	1	29.79	3.14	0.39	3.55	0.05	7.56	6.99	89.4	537.1	0.97	0.2	0.18	1.47	0.5	0.55	-1.29	0.88	0.84	1.95	-0.75
	4	1	1	19.03	2.53	0.4	3.19	0.1	5.09	5.08	53.2	760.3	0.8	0.31	0.25	1.28	0.4	0.5	-1.02	0.71	0.71	1.73	-0.61

## Sheet: Figure 5 E F G
	raw data	number of cells per mm2
	day0							day2							day4
			ki67	pax7	ki67+pax7	ki67+pax7/Pax7(%)				ki67	pax7	ki67+pax7	ki67+pax7/Pax7(%)				ki67	pax7	ki67+pax7	ki67+pax7/Pax7(%)
	control	1	7.79589	10.6308	7.79589	55		control	1	203.756	19.4897	17.7179	91.6667		control	1	81.5025	76.1871	70.8717	93.75
	control	2	1.41743	4.2523	1.41743	20		control	2	143.515	21.2615	14.1743	64.5833		control	2	102.764	85.0461	74.4153	89.9621
	control	3	0	3.54359	0	0		control	3	145.287	30.1205	19.4897	63.3333		control	3	60.241	90.3614	42.523	43.0322
	control	4	0.708717	4.2523	0.708717	10		control	4	76.1871	26.5769	15.9461	60.8333		control	4	76.1871	79.7307	54.9256	77.8947
	control	5	1.41743	0.708717	0	0		control	5	65.5563	10.6308	7.08717	50		control	5	77.9589	77.9589	47.8384	67.0513
	control	6	7.79589	2.83487	2.83487	30		control	6	62.0128	17.7179	17.7179	100		control	6	106.308	100.992	76.1871	78.9975
		average	3.18923	4.37042	2.12615	19.1667			7	85.0461	31.8923	24.8051	78.75			7	84.1602	85.0461	61.1269	75.1146
									average	111.623	22.5271	16.7055	72.7381			average
	Acvr1bfl/fl:Tgfbr1fl/fl	1	38.2707	32.601	18.4266	41.3333		Acvr1bfl/fl:Tgfbr1fl/fl	1						Acvr1bfl/fl:Tgfbr1fl/fl	1	114.812	208.363	60.9497	34.1617
	Acvr1bfl/fl:Tgfbr1fl/fl	2	1.41743	4.96102	0.708717	10		Acvr1bfl/fl:Tgfbr1fl/fl	2	154.146	49.6102	14.1743	33.3333		Acvr1bfl/fl:Tgfbr1fl/fl	2	297.661	506.733	235.648	49.0589
	Acvr1bfl/fl:Tgfbr1fl/fl	3	15.5918	19.8441	12.7569	58.8333		Acvr1bfl/fl:Tgfbr1fl/fl	3	148.831	14.1743	8.85897	62.5		Acvr1bfl/fl:Tgfbr1fl/fl	3	111.623	233.877	76.1871	34.7269
	Acvr1bfl/fl:Tgfbr1fl/fl	4	34.0184	38.9794	7.79589	21.4286		Acvr1bfl/fl:Tgfbr1fl/fl	4	191.354	33.6641	12.4026	31.5476		Acvr1bfl/fl:Tgfbr1fl/fl	4	118.71	163.005	93.905	57.7238
	Acvr1bfl/fl:Tgfbr1fl/fl	5	29.7661	35.0421	20.5528	58.6772		Acvr1bfl/fl:Tgfbr1fl/fl	5	161.233	28.3487	23.0333	75		Acvr1bfl/fl:Tgfbr1fl/fl	5	93.905	129.341	60.241	47.1773
		average	23.8129	26.2855	12.0482	38.0545		Acvr1bfl/fl:Tgfbr1fl/fl	6	76.1871	17.7179	8.85897	68.75		Acvr1bfl/fl:Tgfbr1fl/fl	6	116.938	120.482	77.9589	66.9444
									average	146.35	28.703	13.4656	54.2262			average	142.275	226.967	100.815	48.2988
	day 0
	Tests of Normality
	group		Kolmogorov-Smirnova			Shapiro-Wilk
			Statistic	df	Sig.	Statistic	df	Sig.
	ki67	day 0 control	0.355842	6	0.0168772	0.752284	6	0.0209704
		day 0 d‎KO	0.25338	5	.200*	0.912708	5	0.484034
	pax7	day 0 control	0.341315	6	0.0276767	0.846997	6	0.148815
		day 0 d‎KO	0.275353	5	.200*	0.892981	5	0.372314
	ki67_pax7	day 0 control	0.261854	6	.200*	0.776846	6	0.0360164
		day 0 d‎KO	0.183792	5	.200*	0.955096	5	0.773494
	*. This is a lower bound of the true significance.
	a. Lilliefors Significance Correction
	Mann-Whitney U test for ki67 &ki67/pax7
	independent t test for pax7
	Independent Samples Test
			Levene's Test for Equality of Variances		t-test for Equality of Means
			F	Sig.	t	df	Sig. (2-tailed)	Mean Difference	Std. Error Difference	95% Confidence Interval of the Difference
										Lower	Upper
	pax7	Equal variances assumed	10.7675	0.00950822	-3.77265	9	0.00439845	-21.9133	5.80847	-35.053	-8.77367
		Equal variances not assumed			-3.44416	4.38434	0.0226354	-21.9133	6.36246	-38.9841	-4.8426
	day 2
	Tests of Normality
	group		Kolmogorov-Smirnova			Shapiro-Wilk
			Statistic	df	Sig.	Statistic	df	Sig.
	ki67	day 2 control	0.262002	7	0.158325	0.865873	7	0.17075
		day 2 dKO	0.32306	5	0.0958613	0.874615	5	0.285615
	pax7	day 2 control	0.136439	7	.200*	0.961911	7	0.834952
		day 2 dKO	0.182638	5	.200*	0.94578	5	0.707034
	ki67_pax7	day 2 control	0.17862	7	.200*	0.952016	7	0.748009
		day 2 dKO	0.25055	5	.200*	0.844846	5	0.178768
	*. This is a lower bound of the true significance.
	a. Lilliefors Significance Correction
	independent t test
	Independent Samples Test
			Levene's Test for Equality of Variances		t-test for Equality of Means
			F	Sig.	t	df	Sig. (2-tailed)	Mean Difference	Std. Error Difference	95% Confidence Interval of the Difference
										Lower	Upper
	ki67	Equal variances assumed	1.3433	0.27338	-1.19942	10	0.258012	-34.7114	28.9402	-99.1942	29.7714
		Equal variances not assumed			-1.24997	9.8042	0.240324	-34.7114	27.7699	-96.7545	27.3316
	pax7	Equal variances assumed	1.617	0.232288	-0.990952	10	0.34508	-6.17143	6.22777	-20.0478	7.70492
		Equal variances not assumed			-0.893482	5.63341	0.408145	-6.17143	6.90717	-23.3429	11
	ki67_pax7	Equal variances assumed	0.0378283	0.849683	0.989653	10	0.345685	3.22	3.25366	-4.02962	10.4696
		Equal variances not assumed			0.976737	8.35077	0.356143	3.22	3.29669	-4.32695	10.767
	day 4
	Tests of Normality
	group		Kolmogorov-Smirnova			Shapiro-Wilk
			Statistic	df	Sig.	Statistic	df	Sig.
	ki67	day 4 control	0.227444	6	.200*	0.921008	6	0.512648
		day 4 dKO	0.454053	6	0.0003013	0.603774	6	0.000509363
	pax7	day 4 control	0.215838	6	.200*	0.900168	6	0.374927
		day 4 dKO	0.314126	6	0.0651361	0.765823	6	0.0283294
	ki67_pax7	day 4 control	0.248959	6	.200*	0.878461	6	0.262066
		day 4 dKO	0.37422	6	0.00869722	0.661207	6	0.00234988
	*. This is a lower bound of the true significance.
	a. Lilliefors Significance Correction
	Mann-Whitney U test

## Sheet: Sheet3
	number of MyoG per mm2			day 0
	Acvr1bfl/fl:Tgfbr1fl/fl	control		Tests of Normality
day 0	3.57781	7.87118		group		Kolmogorov-Smirnova			Shapiro-Wilk
day 0	3.57781	1.43112				Statistic	df	Sig.	Statistic	df	Sig.
day 0	10.7334	5.56548		myog	day 0 control	0.196361	6	.200*	0.92416	6	0.535814
day 0	7.15562	5.72449			day 0 d‎KO	0.203158	5	.200*	0.887297	5	0.343695
day 0	5.56548	1.59014			day 2 control	0.186931	7	.200*	0.942513	7	0.661447
day 0		3.97534			day 2 dKO	0.198372	5	.200*	0.956989	5	0.786878
day 2	19.678	14.3112			day 4 control	0.193972	6	.200*	0.889522	6	0.315693
day 2	16.1001	23.2558			day 4 dKO	0.16126	7	.200*	0.966972	7	0.875824
day 2	12.5223	7.15562		*. This is a lower bound of the true significance.
day 2	8.94452	8.94452		a. Lilliefors Significance Correction
day 2	10.7334	14.3112
day 2		1.7889
day 2		7.15562
day 4	119.857	380.878
day 4	100.179	406.516		Independent Samples Test
day 4	152.653	295.169				Levene's Test for Equality of Variances		t-test for Equality of Means
day 4	203.935	216.832				F	Sig.	t	df	Sig. (2-tailed)	Mean Difference	Std. Error Difference	95% Confidence Interval of the Difference
day 4	81.7018	277.28											Lower	Upper
day 4	80.5007	339.892		myog	Equal variances assumed	0.0746698	0.790822	-1.06174	9	0.316013	-1.7624	1.65992	-5.5174	1.9926
day 4	258.028				Equal variances not assumed			-1.04441	7.95118	0.327005	-1.7624	1.68746	-5.65785	2.13305
				day 2
				Tests of Normality
				group		Kolmogorov-Smirnova			Shapiro-Wilk
						Statistic	df	Sig.	Statistic	df	Sig.
				myog	day 0 control	0.196361	6	.200*	0.92416	6	0.535814
					day 0 d‎KO	0.203158	5	.200*	0.887297	5	0.343695
					day 2 control	0.186931	7	.200*	0.942513	7	0.661447
					day 2 dKO	0.198372	5	.200*	0.956989	5	0.786878
					day 4 control	0.193972	6	.200*	0.889522	6	0.315693
					day 4 dKO	0.16126	7	.200*	0.966972	7	0.875824
				*. This is a lower bound of the true significance.
				a. Lilliefors Significance Correction
				Independent Samples Test
						Levene's Test for Equality of Variances		t-test for Equality of Means
						F	Sig.	t	df	Sig. (2-tailed)	Mean Difference	Std. Error Difference	95% Confidence Interval of the Difference
													Lower	Upper
				myog	Equal variances assumed	1.11185	0.316491	-0.736859	10	0.478139	-2.60669	3.53757	-10.4889	5.27551
					Equal variances not assumed			-0.799318	9.89301	0.442874	-2.60669	3.26114	-9.88363	4.67025
				day 4
				Tests of Normalitya
				group		Kolmogorov-Smirnovb			Shapiro-Wilk
						Statistic	df	Sig.	Statistic	df	Sig.
				myog	day 4 control	0.193972	6	.200*	0.889522	6	0.315693
					day 4 dKO	0.16126	7	.200*	0.966972	7	0.875824
				*. This is a lower bound of the true significance.
				a. There are no valid cases for myog when group = 1.000. Statistics cannot be computed for this level.
				b. Lilliefors Significance Correction
				Independent Samples Test
						Levene's Test for Equality of Variances		t-test for Equality of Means
						F	Sig.	t	df	Sig. (2-tailed)	Mean Difference	Std. Error Difference	95% Confidence Interval of the Difference
													Lower	Upper
				myog	Equal variances assumed	1.36073	0.268078	-5.63368	11	0.000152468	-187.519	33.2853	-260.779	-114.258
					Equal variances not assumed			-5.79601	10.6579	0.000135751	-187.519	32.3531	-259.007	-116.03
