# Supplementary material for: Lack of Tgfbr1 and Acvr1b synergistically stimulates myofibre hypertrophy and accelerates muscle regeneration
Source: eLife. 2022 Mar 24;11:e77610. doi: 10.7554/eLife.77610 (PMC9005187; doi:10.7554/eLife.77610)
Supplement: Figure 6—source data 1. [file elife-77610-fig6-data1.xlsx]

## Sheet: Figure 6 B
DATA SUMMARY				CTGF	Control		Acvr1bfl/fl		Tgfbr1fl/fl		Acvr1bfl/fl:Tgfbr1fl/fl				Post HOC Bonferroni Pvalues				Ctgf	Col1a1	Col3a1	Pdgfra	Tcf4
					Mean	SEM	Mean	SEM	Mean	SEM	Mean	SEM			Day0	Control	Tgfbr1		1	1	1	0.149638	0.112876
N				Day 0	1	0.13	0.8	0.08	0.9	0.09	4.6	0.75				Control	Acvr1b		1	1	1	0.0274785	0.0191493
Control	Day 0	7		Day 2	0.9	0.13	1.1	0.08	1	0.14	3.8	1.49				Control	Acvr1b:Tgfbr1		0.000247511	0.0155606	0.0139973	0.00065348	0.0707165
	Day 2	7		Day 4	0.9	0.09	0.9	0.12	1	0.13	1.9	0.22				Acvr1b	Tgfbr1		1	0.188152	1	1	1
	Day 4	8		Col1a1												Tgfbr1	Acvr1b:Tgfbr1		2.327e-05	0.0067314	0.00596762	0.174508	1
Acvr1bfl/fl	Day 0	8		Day 0	1	0.15	1.3	0.17	0.8	0.15	2.1	0.15				Acvr1b	Acvr1b:Tgfbr1		5.32535e-06	0.0686051	0.000131034	0.374398	1
	Day 2	8		Day 2	1.6	0.16	1.4	0.08	1.8	0.28	3.9	0.64
	Day 4	8		Day 4	2.4	0.18	2.3	0.12	2.2	0.15	5.2	0.5			Day2	Control	Tgfbr1		1	1	1	1	1
Tgfbr1fl/fl	Day 0	6		Col3a1												Control	Acvr1b		0.864157	1	0.146136	1	1
	Day 2	6		Day 0	1	0.13	1.1	0.1	0.9	0.04	2.1	0.24				Control	Acvr1b:Tgfbr1		0.0149351	0.00358156	0.828968	1	0.139062
	Day 4	6		Day 2	2	0.34	1.1	0.09	1.8	0.17	2.8	0.29				Acvr1b	Tgfbr1		1	0.916806	0.00913514	1	0.832528
Acvr1bfl/fl:Tgfbr1fl/fl	Day 0	5		Day 4	3	0.54	2.5	0.17	2.8	0.19	5.1	0.64				Tgfbr1	Acvr1b:Tgfbr1		0.071057	0.0289126	0.086396	1	1
	Day 2	5		Pdgfra												Acvr1b	Acvr1b:Tgfbr1		0.0181309	0.000149327	0.000118141	1	0.0718685
	Day 4	6		Day 0	1.22864	0.283952	2.24458	0.263571	1.95548	0.250808	3.67542	0.360873
				Day 2	2.95457	0.141296	2.73903	0.0841247	3.06238	0.176906	2.86264	0.312175			Day4	Control	Tgfbr1		1	1	1	0.182577	1
				Day 4	1.42517	0.0444281	1.46854	0.0816598	1.61758	0.0734877	2.2869	0.14266				Control	Acvr1b		1	1	1	1	1
				Tcf4												Control	Acvr1b:Tgfbr1		0.00382052	0.000201152	0.0685097	2.00139e-06	0.00588416
				Day 0	1.253	0.29002	2.334	0.179091	2.144	0.28553	2.268	0.222344				Acvr1b	Tgfbr1		1	1	1	0.0815917	1
				Day 2	1.276	0.0453242	1.237	0.0255214	1.427	0.0585334	1.594	0.181321				Tgfbr1	Acvr1b:Tgfbr1		0.0248772	0.000654684	0.0114773	0.000377681	0.0174902
				Day 4	1.421	0.047967	1.529	0.0836623	1.443	0.034147	1.82	0.111736				Acvr1b	Acvr1b:Tgfbr1		0.0120187	1.62599e-05	0.000956996	0	0.0697957
Log transformation was performed
Three way ANOVA summaries
Tests of Between-Subjects Effects								Tests of Between-Subjects Effects							Tests of Between-Subjects Effects							Tests of Between-Subjects Effects							Tests of Between-Subjects Effects
Dependent Variable: logctgf								Dependent Variable: logcol							Dependent Variable: logcol3							Dependent Variable: logPdgfra	lg_pdgfra23						Dependent Variable: Tcf4	Tcf4
Source	Type III Sum of Squares	df	Mean Square	F	Sig.			Source	Type III Sum of Squares	df	Mean Square	F	Sig.		Source	Type III Sum of Squares	df	Mean Square	F	Sig.		Source	Type III Sum of Squares	df	Mean Square	F	Sig.		Source	Type III Sum of Squares	df	Mean Square	F	Sig.
Corrected Model	3,623a	11	0.329	12.801	0			Corrected Model	3,829a	11	0.348	22.416	0		Corrected Model	3,889a	11	0.354	20.922	0		Corrected Model	2.035a	11	0.184983	11.7096	5.77846e-12		Corrected Model	11.922a	11	1.08378	6.86014	1.15244e-07
Intercept	0.47	1	0.47	18.253	0			Intercept	5.375	1	5.375	346.178	0		Intercept	5.502	1	5.502	325.602	0		Intercept	8.14992	1	8.14992	515.896	9.6265e-34		Intercept	212.532	1	212.532	1345.29	5.47329e-47
Day	0.153	2	0.077	2.978	0.058			Day	1.926	2	0.963	62.033	0		Day	2.433	2	1.216	71.991	0		day	0.796352	2	0.398176	25.2048	6.05943e-09		day	5.17627	2	2.58814	16.3824	1.50719e-06
Acvr1b	1.261	1	1.261	49.016	0			Acvr1b	0.798	1	0.798	51.42	0		Acvr1b	0.185	1	0.185	10.95	0.001		alk4	0.275318	1	0.275318	17.4278	8.56665e-05		alk4	1.80261	1	1.80261	11.4102	0.00120404
Tgfbr1	1.359	1	1.359	52.842	0			Tgfbr1	0.465	1	0.465	29.963	0		Tgfbr1	0.498	1	0.498	29.467	0		alk5	0.325423	1	0.325423	20.5995	2.33008e-05		alk5	1.4748	1	1.4748	9.3352	0.00319451
Day * Acvr1b	0.107	2	0.053	2.077	0.133			Day * Acvr1b	0.075	2	0.037	2.403	0.098		Day * Acvr1b	0.159	2	0.079	4.693	0.012		day * alk4	0.385632	2	0.192816	12.2054	2.89468e-05		day * alk4	0.961238	2	0.480619	3.04223	0.0541772
Day * Tgfbr1	0.08	2	0.04	1.546	0.22			Day * Tgfbr1	0.088	2	0.044	2.835	0.066		Day * Tgfbr1	0.011	2	0.005	0.314	0.731		day * alk5	0.176705	2	0.0883525	5.59278	0.00561019		day * alk5	0.217711	2	0.108855	0.689034	0.505482
Acvr1b*Tgfbr1	1.1	1	1.1	42.751	0			Acvr1b*Tgfbr1	0.67	1	0.67	43.126	0		Acvr1b*Tgfbr1	0.555	1	0.555	32.869	0		alk4 * alk5	0.0043174	1	0.0043174	0.273294	0.602805		alk4 * alk5	0.127364	1	0.127364	0.806193	0.372371
Day * ACvr1b*Tgfbr1	0.227	2	0.113	4.407	0.016			Day * ACvr1b*Tgfbr1	0.003	2	0.002	0.102	0.904		Day * ACvr1b*Tgfbr1	0.01	2	0.005	0.282	0.755		day * alk4 * alk5	0.0308468	2	0.0154234	0.976312	0.38184		day * alk4 * alk5	1.52943	2	0.764715	4.84051	0.010784
Error	1.749	68	0.026					Error	1.056	68	0.016				Error	1.149	68	0.017				Error	1.09003	69	0.0157976				Error	10.9008	69	0.157982
Total	5.565	80						Total	9.939	80					Total	10.245	80					Total	11.0203	81					Total	236.179	81
Corrected Total	5.372	79						Corrected Total	4.884	79					Corrected Total	5.038	79					Corrected Total	3.12485	80					Corrected Total	22.8224	80
a. R Squared = ,674 (Adjusted R Squared = ,622)								a. R Squared = ,784 (Adjusted R Squared = ,749)							a. R Squared = ,772 (Adjusted R Squared = ,735)
	raw data	Day: 0=day 0, 2=day 2, 4=day4; Acvr1bKO: 0=no knockout, 1=knockout; Tgfbr1KO: 0=no knockout, 1=knockout
	Day	Acvr1b KO	Tgfbr1 KO	ctgf	col1a1	col3	logigctgf	logcol1	logcol3	pdgfra	tcf4	TCF4	PDGFRa
	0	0	0	0.46	0.42	0.81	-0.33	-0.38	-0.09	0.754443	0.752814	0.803746	0.805486
	0	0	0	1.07	0.98	1.05	0.03	-0.01	0.02	0.427583	0.402874	0.68521	0.727235
	0	0	0	0.63	0.73	1.33	-0.2	-0.14	0.12	0.345023	0.31202	0.589446	0.651794
	0	0	0	1.2	0.81	0.52	0.08	-0.09	-0.28	1.40491	1.7029	1.33142	1.09844
	0	0	0	1.47	1.23	0.65	0.17	0.09	-0.19	1.52938	1.76457	1.23017	1.06621
	0	0	0	1.16	1.16	1.27	0.06	0.06	0.1	2.38832	2.32149	1.58543	1.63107
	0	0	0	1.02	1.67	1.37	0.01	0.22	0.14	1.75084	1.51484	1.18627	1.37109
	0	0	1	1.06	0.61	0.98	0.02	-0.22	-0.01	1.26349	1.58377	2.15321	1.7179
	0	0	1	0.57	0.5	0.84	-0.24	-0.3	-0.08	1.97933	1.56352	0.997409	1.25874
	0	0	1	0.71	0.8	0.93	-0.15	-0.1	-0.03	2.63209	2.94403	3.31305	2.96057
	0	0	1	1.15	0.55	0.73	0.06	-0.26	-0.13	2.12623	2.92123	3.11277	2.26899
	0	0	1	0.77	0.8	0.96	-0.11	-0.1	-0.02	2.53844	2.4014	2.69255	2.84715
	0	0	1	1.01	1.5	0.88	0	0.18	-0.05	1.1933	1.44785	1.08245	0.892696
	0	1	0	0.52	1.47	1.32	-0.29	0.17	0.12	3.21668	3.04673	3.42781	3.61798
	0	1	0	0.68	1.43	1.14	-0.16	0.16	0.06	3.0587	2.54976	2.89934	3.46843
	0	1	0	0.79	1.83	0.99	-0.1	0.26	0	3.11832	2.76529	3.19039	3.60846
	0	1	0	0.93	0.76	0.62	-0.03	-0.12	-0.21	1.8984	2.65002	3.00941	2.15277
	0	1	0	0.62	1.01	0.87	-0.2	0	-0.06	1.78019	2.31966	2.86848	2.19704
	0	1	0	0.98	1.14	1.42	-0.01	0.06	0.15	1.47949	1.62652	1.20202	1.14714
	0	1	0	1.2	0.74	0.93	0.08	-0.13	-0.03	1.63043	1.85464	1.25638	1.14281
	0	1	0	0.96	2.05	1.31	-0.02	0.31	0.12	1.77442	1.85946	1.40866	1.23469
	0	1	1	7.2	2.23	1.99	0.86	0.35	0.3	3.66829	2.25291	1.577	2.56775
	0	1	1	3.24	2.68	1.62	0.51	0.43	0.21	3.14784	1.82431	1.35856	2.34419
	0	1	1	5.38	1.85	1.68	0.73	0.27	0.23	4.99813	3.04897	1.52274	2.49619
	0	1	1	3.61	1.9	2.33	0.56	0.28	0.37	3.64621	2.36153	1.59716	2.46601
	0	1	1	3.55	2	2.95	0.55	0.3	0.47	2.91661	1.85209	1.60515	2.52772
	2	0	0	0.6	1.54	3.21	-0.22	0.19	0.51	3.13028	1.26165
	2	0	0	0.7	2.07	2.27	-0.15	0.31	0.36	3.26929	1.0461
	2	0	0	0.7	2.17	2.51	-0.16	0.34	0.4	3.68788	1.31542
	2	0	0	0.81	1.05	2.64	-0.09	0.02	0.42	3.15215	1.33633
	2	0	0	0.67	1.36	1.47	-0.18	0.13	0.17	2.93995	1.23609
	2	0	0	1.36	1.67	0.89	0.13	0.22	-0.05	2.67217	1.04596
	2	0	0	1.4	1.25	0.99	0.15	0.1	0	2.58854	1.15691
	2	0	0							2.19626	1.80828
	2	0	1	1.04	1.68	2.52	0.02	0.23	0.4	3.26264	1.42744
	2	0	1	1.04	1.61	1.6	0.02	0.21	0.2	3.58474	1.53728
	2	0	1	1.06	1.53	1.69	0.02	0.18	0.23	3.0617	1.23771
	2	0	1	0.45	1.09	1.39	-0.35	0.04	0.14	3.24076	1.29731
	2	0	1	1.22	1.72	1.57	0.09	0.24	0.2	2.30498	1.62139
	2	0	1	1.49	3.09	2.13	0.17	0.49	0.33	2.91946	1.44063
	2	1	0	0.74	1.21	0.85	-0.13	0.08	-0.07	2.93379	1.22552
	2	1	0	0.94	1.55	1.19	-0.03	0.19	0.08	3.00221	1.18655
	2	1	0	1.01	1.33	1.12	0.01	0.13	0.05	2.77259	1.15179
	2	1	0	1.15	1.77	1.54	0.06	0.25	0.19	2.24987	1.21193
	2	1	0	0.86	1.25	1.16	-0.06	0.1	0.07	2.92468	1.27807
	2	1	0	1.45	1.4	0.9	0.16	0.14	-0.04	2.63593	1.17079
	2	1	0	1.26	1.58	1.32	0.1	0.2	0.12	2.69458	1.34009
	2	1	0	1.26	1.14	0.87	0.1	0.06	-0.06	2.69861	1.33296
	2	1	1	1.34	2.6	1.94	0.13	0.42	0.29	2.56269	1.29988
	2	1	1	3.28	4.95	3.74	0.52	0.69	0.57	2.22569	1.66634
	2	1	1	2.56	3.66	2.63	0.41	0.56	0.42	2.79244	1.26661
	2	1	1	9.6	5.83	2.88	0.98	0.77	0.46	2.68015	1.47436
	2	1	1	2.1	2.63	2.58	0.32	0.42	0.41	4.05225	2.26057
	4	0	0	0.65	2.29	3.05	-0.19	0.36	0.48	1.4436	1.49167
	4	0	0	0.48	2.51	3.21	-0.32	0.4	0.51	1.40289	1.30964
	4	0	0	1.21	1.65	6.45	0.08	0.22	0.81	1.35516	1.24423
	4	0	0	0.83	2.3	2.87	-0.08	0.36	0.46	1.23327	1.2766
	4	0	0	0.77	2.21	1.66	-0.12	0.34	0.22	1.41729	1.62944
	4	0	0	1.17	2.52	2.38	0.07	0.4	0.38	1.65964	1.46782
	4	0	0	0.7	2.41	1.92	-0.16	0.38	0.28	1.52275	1.40973
	4	0	0	1.02	3.52	2.14	0.01	0.55	0.33	1.36673	1.53757
	4	0	1	0.52	1.65	2.65	-0.29	0.22	0.42	1.34646	1.33714
	4	0	1	1.06	2.02	2.58	0.03	0.31	0.41	1.53563	1.46553
	4	0	1	1.45	2.73	3.19	0.16	0.44	0.5	1.68814	1.40428
	4	0	1	0.85	2.33	3.35	-0.07	0.37	0.53	1.66598	1.49878
	4	0	1	1.11	2.31	2.97	0.05	0.36	0.47	1.88804	1.38655
	4	0	1	0.83	2.29	2.09	-0.08	0.36	0.32	1.5812	1.56737
	4	1	0	0.92	2.04	2.39	-0.04	0.31	0.38	1.40937	1.43032
	4	1	0	0.57	2.23	2.13	-0.24	0.35	0.33	1.26978	1.51921
	4	1	0	0.73	2.24	3.03	-0.13	0.35	0.48	1.49632	1.28479
	4	1	0	0.49	1.85	1.85	-0.31	0.27	0.27	1.07584	1.31195
	4	1	0	1.42	2.11	3.27	0.15	0.32	0.52	1.43422	1.32349
	4	1	0	0.76	2.95	2.48	-0.12	0.47	0.4	1.60477	1.71877
	4	1	0	1.35	2.48	2.63	0.13	0.39	0.42	1.62895	1.7151
	4	1	0	0.98	2.18	2.26	-0.01	0.34	0.35	1.82905	1.93212
	4	1	1	2.05	3.72	3.35	0.31	0.57	0.53	2.68428	2.14877
	4	1	1	2.22	6.06	4.43	0.35	0.78	0.65	2.49215	1.66422
	4	1	1	1.03	4.27	3.95	0.01	0.63	0.6	1.66869	1.39101
	4	1	1	2.61	4.77	5.13	0.42	0.68	0.71	2.22119	2.03718
	4	1	1	1.7	7.08	7.43	0.23	0.85	0.87	2.42929	1.91076
	4	1	1	1.67	5.35	6.49	0.22	0.73	0.81	2.22578	1.76756
