# Supplementary material for: Lack of Tgfbr1 and Acvr1b synergistically stimulates myofibre hypertrophy and accelerates muscle regeneration
Source: eLife journal article supplement (doi:10.7554/elife.77610), 2022-03-24

**A**

DAPI

Ki67

Pax7

Ki67/Pax7/DAPI

Ki67/Pax7/DAPI/WGA

control

Acvr1b: *Tgfbbr1* CKO**B**

DAPI

Ki67

Pax7

Ki67/Pax7/DAPI

Ki67/Pax7/DAPI/WGA

control

Acvr1b: *Tgfbbr1* CKO**C**

DAPI

Ki67

Pax7

Ki67/Pax7/DAPI

Ki67/Pax7/DAPI/WGA

control

Acvr1b: *Tgfbbr1* CKO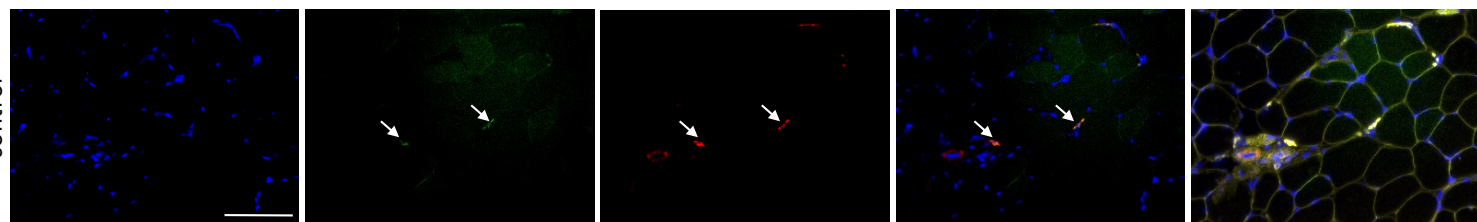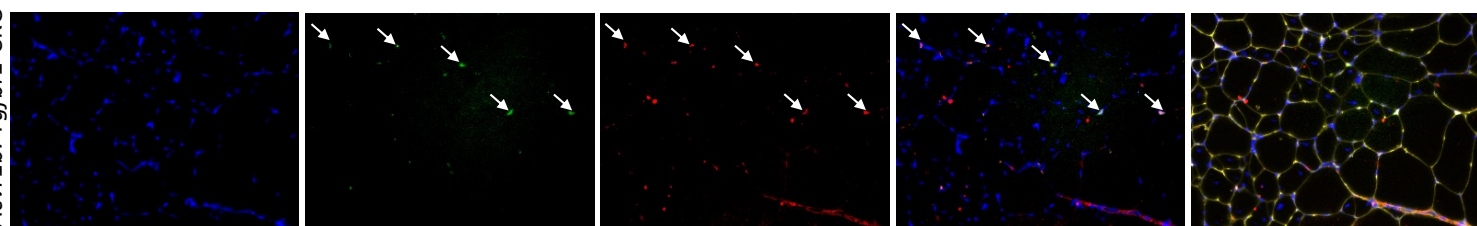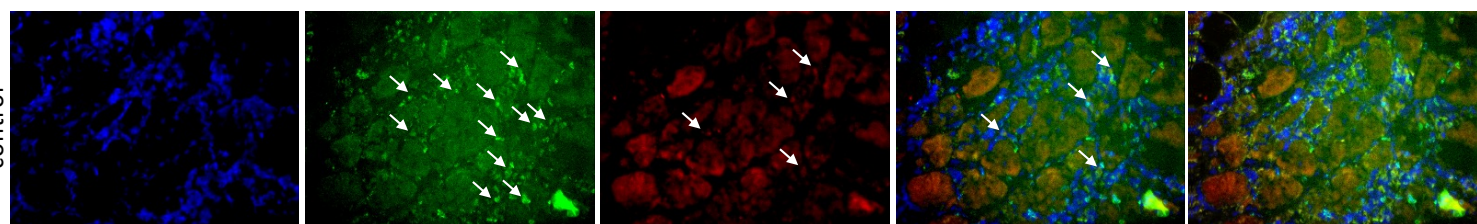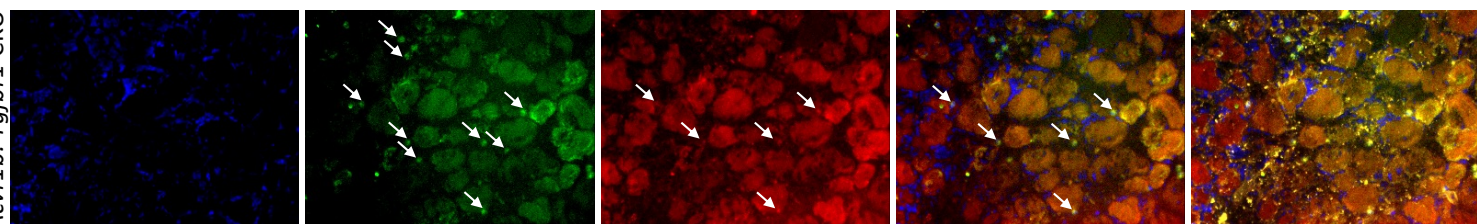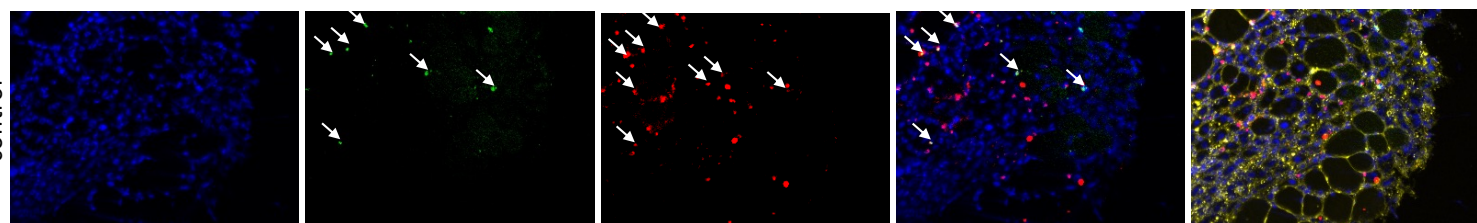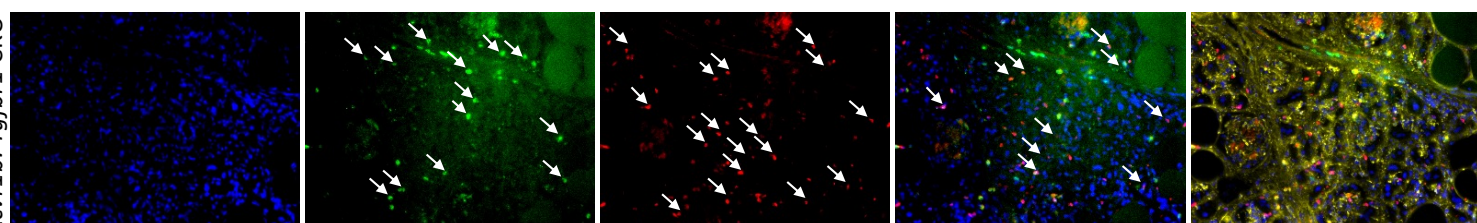

Supplement: supp [file elife_poa_e77610_Figure_5_figure_supplement_2.pdf › elife_poa_e77610_Figure_5_figure_supplement_2.pdf]
