# Supplementary figures and images for: Lack of Tgfbr1 and Acvr1b synergistically stimulates myofibre hypertrophy and accelerates muscle regeneration
Source: eLife journal article supplement (doi:10.7554/elife.77610), 2022-03-24

F4/80/DAPI/WGA

Day 2

Day 4

Control

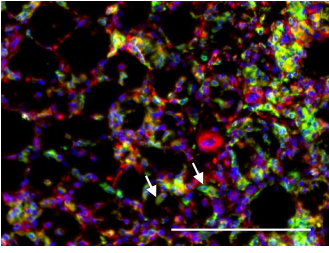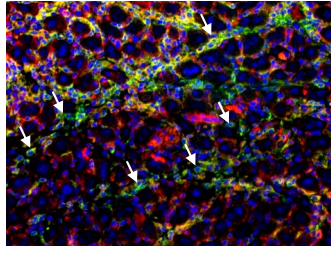

Acvr1b: Tgfb $\beta$ 1 CKO

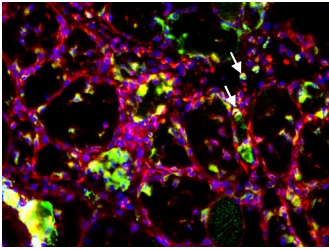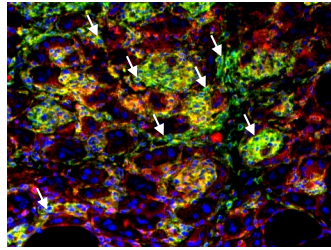

Supplement: supp [file elife_poa_e77610_Figure_5_figure_supplement_1.pdf › elife_poa_e77610_Figure_5_figure_supplement_1.pdf]

**A**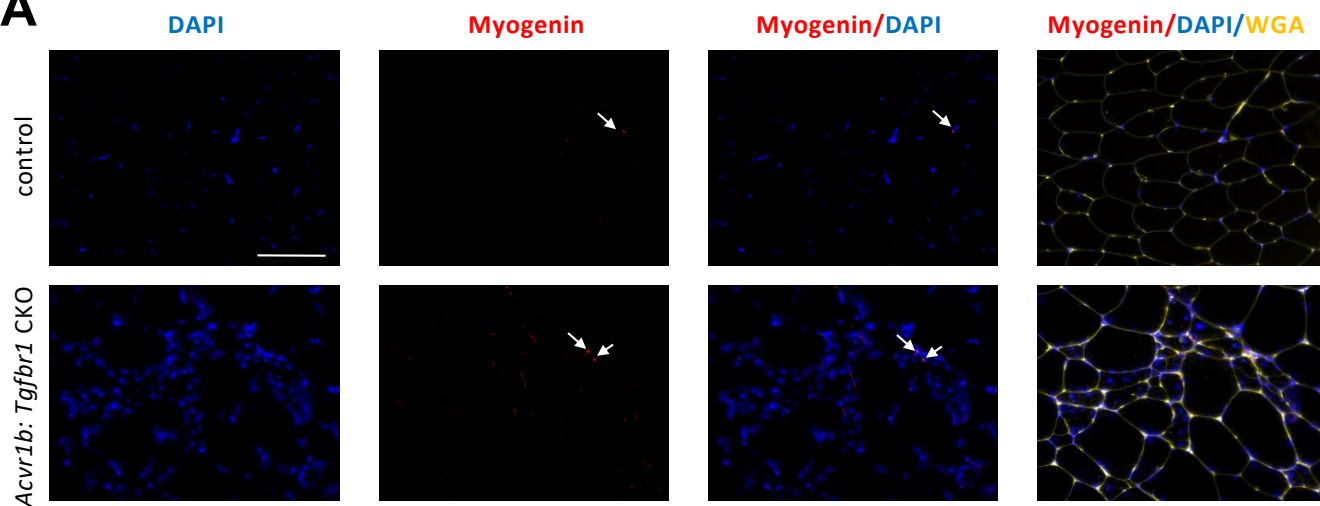**B**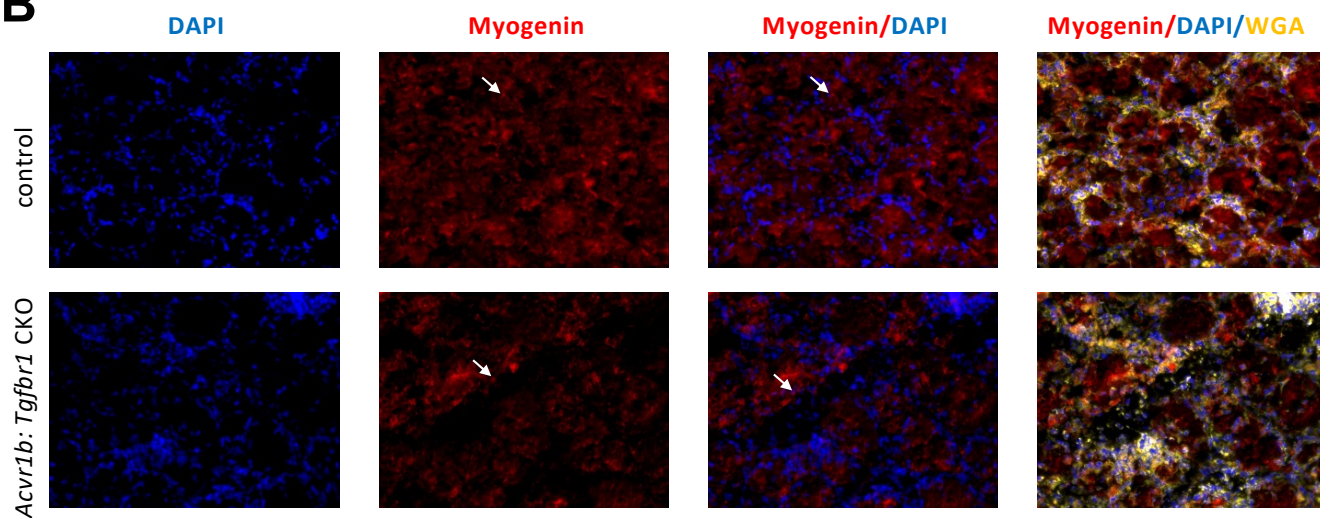**C**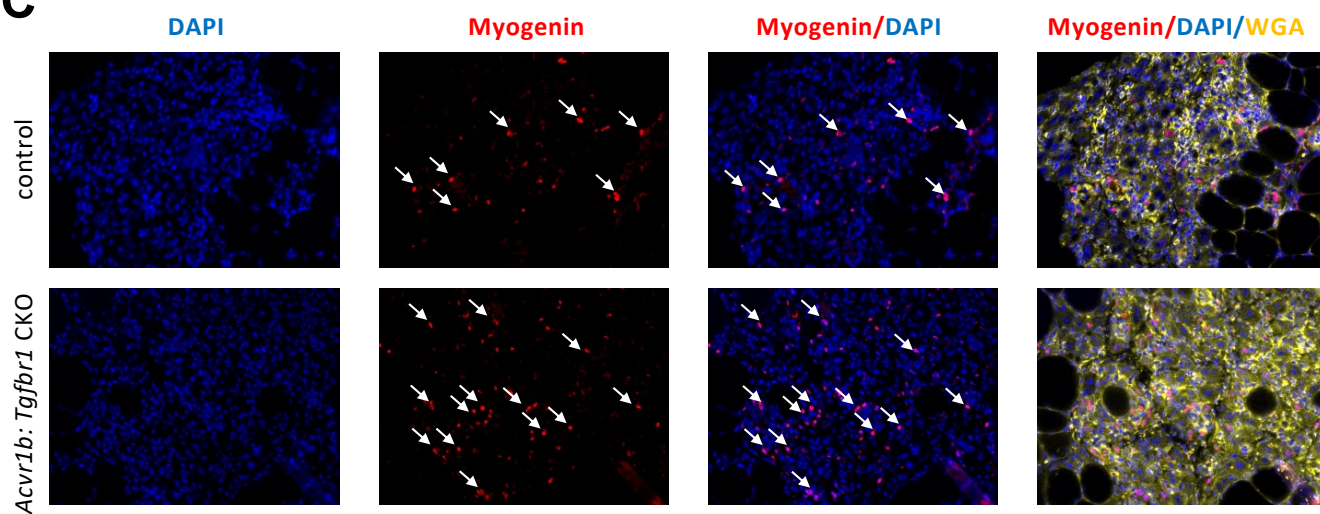

Supplement: supp [file elife_poa_e77610_Figure_5_figure_supplement_3.pdf › elife_poa_e77610_Figure_5_figure_supplement_3.pdf]
